1  
2  
3  
4  
5  
6  
7  
8  
9  
10  
11  
12  
13  
14  
15  
16  
17  
18  
19  
20  
21  
22  
23

## Functional redundancy of variant and canonical histone

### H3 lysine 9 modification in *Drosophila*

Taylor J.R. Penke<sup>\*</sup>, Daniel J. McKay<sup>\*,†,\*\*,††</sup>, Brian D. Strahl<sup>\*,‡,§</sup>,

A. Gregory Matera<sup>\*,†,§,\*\*,††</sup>, and Robert J. Duronio<sup>\*,†,§,\*\*,††,1</sup>

<sup>\*</sup>Curriculum in Genetics and Molecular Biology

<sup>†</sup>Integrative Program for Biological and Genome Sciences

<sup>‡</sup>Department of Biochemistry and Biophysics

<sup>§</sup>Lineberger Comprehensive Cancer Center

<sup>\*\*</sup>Department of Genetics,

<sup>††</sup>Department of Biology,

The University of North Carolina at Chapel Hill, Chapel Hill, NC, 27599

24

25 Running title: Variant and canonical H3K9 function

26

27 Key words: Drosophila, histone variant, H3, transcription, heterochromatin

28

29 <sup>1</sup>To whom correspondence should be addressed

30

31 Robert J. Duronio

32 Integrative Program for Biological and Genome Sciences, CB#7100

33 University of North Carolina

34 Chapel Hill, NC 27599

35 Voice: (919) 962-4568

36 FAX: (919) 962-4574

37 Email: [duronio@med.unc.edu](mailto:duronio@med.unc.edu)

38

39

40

41

42

43

44

45

46

47

48 **ABSTRACT**

49 Histone post-translational modifications (PTMs) and differential incorporation of  
50 variant and canonical histones into chromatin are central modes of epigenetic  
51 regulation. Despite similar protein sequences, histone variants are enriched for different  
52 suites of PTMs compared to their canonical counterparts. For example, variant histone  
53 H3.3 occurs primarily in transcribed regions and is enriched for “active” histone PTMs  
54 like Lys9 acetylation (H3.3K9ac), whereas the canonical histone H3 is enriched for Lys9  
55 methylation (H3K9me), which is found in transcriptionally silent heterochromatin. To  
56 determine the functions of K9 modification on variant versus canonical H3, we  
57 compared the phenotypes caused by engineering  $H3.3^{K9R}$  and  $H3^{K9R}$  mutant genotypes  
58 in *Drosophila melanogaster*. Whereas most  $H3.3^{K9R}$  and a small number of  $H3^{K9R}$   
59 mutant animals are capable of completing development and do not have substantially  
60 altered protein coding transcriptomes, all  $H3.3^{K9R} H3^{K9R}$  combined mutants die soon  
61 after embryogenesis and display decreased expression of genes enriched for K9ac.  
62 These data suggest that the role of K9ac in gene activation during development can be  
63 provided by either H3 or H3.3. Conversely, we found that H3.3K9 is methylated at  
64 telomeric transposons, and this mark contributes to repressive chromatin architecture,  
65 supporting a role for H3.3 in heterochromatin that is distinct from that of H3. Thus, our  
66 genetic and molecular analyses demonstrate that K9 modification of variant and  
67 canonical H3 have overlapping roles in development and transcriptional regulation,  
68 though to differing extents in euchromatin and heterochromatin.

69

70

## 71 **INTRODUCTION**

72 DNA interacts with histones and other proteins to establish chromatin environments that  
73 affect all DNA-dependent processes. The establishment of chromatin environments is  
74 accomplished through multiple mechanisms that collectively comprise the bulk of  
75 epigenetic regulation found in eukaryotes. In particular, post-translational modification  
76 (PTM) of histones influences DNA/histone interactions and also provides binding sites  
77 for recruitment of chromatin modulators that influence gene expression, DNA replication  
78 and repair, and chromosome segregation during cell division (Wallrath et al. 2014). In  
79 addition to histone PTMs, epigenetic regulation is modulated by the type of histone  
80 protein deposited onto DNA. There are two major categories of histone proteins: the  
81 canonical histones and the closely related histone variants (Talbert and Henikoff 2010,  
82 2017). These two histone categories are distinguished by the timing of their expression  
83 during the cell cycle and their mechanism of deposition onto DNA. Canonical histones  
84 are encoded by multiple genes (e.g., ~55 in humans and ~500 in flies), organized into  
85 clusters that are highly expressed during S-phase of the cell cycle, and are deposited  
86 onto DNA by the histone chaperone CAF-1 in a replication-coupled manner (Marzluff et  
87 al. 2002; Tagami et al. 2004; Verreault et al. 1996). In contrast, variant histones are  
88 typically encoded by one or two genes, are expressed throughout the cell cycle, and  
89 can be deposited onto DNA independently of replication by histone chaperones other  
90 than CAF-1 (Henikoff and Ahmad 2005; Tagami et al. 2004; Szenker et al. 2011).  
91 Variant histones are often deposited at specific genomic locations and have functions  
92 that can differ from canonical histones. For example, two histone H2A variants, H2AX

93 and H2A.Z, play critical roles in DNA repair (Scully and Xie 2013; Price and Andrea  
94 2014), and the histone H3 variant CENP-A localizes to centromeres and is essential for  
95 kinetochore formation (Blower and Karpen 2001; Henikoff and Ahmad 2005; Mellone  
96 and Allshire 2003).

97         The major histone H3 variant in animal genomes is H3.3, which in both mice and  
98 *Drosophila* is encoded by two different genes (*H3.3A* and *H3.3B*) that produce identical  
99 proteins. Variant histone H3.3 differs from canonical H3.2 and H3.1 by only four or five  
100 amino acids, respectively (Szenker et al. 2011). In each case, three of these different  
101 amino acids are located in the globular domain of H3.3 and are necessary and sufficient  
102 for interaction with the replication-independent chaperones HIRA and ATRX-DAXX  
103 (Tagami et al. 2004; Goldberg et al. 2010; Ahmad and Henikoff 2002; Lewis et al.  
104 2010). In H3.2, the only replication-dependent histone in *Drosophila*, the fourth amino  
105 acid difference occurs at position 31 in the unstructured N-terminal tail (Szenker et al.  
106 2011). Histones H3.2 and H3.1 (collectively hereafter referred to as H3) along with H3.3  
107 are some of the most conserved proteins in all eukaryotes (Malik and Henikoff 2003).  
108 The conservation of amino acid differences between H3 and H3.3 during evolution  
109 strongly suggests that these proteins perform distinct functions. Indeed, H3.3 and H3  
110 are deposited in different genomic regions in a variety of species (Mito et al. 2005;  
111 Schwartz and Ahmad 2005; Tamura et al. 2009; Jin et al. 2011; Kraushaar et al. 2013;  
112 Allis and Wiggins 1984). H3.3 is also enriched for different histone PTMs than H3 (Hake  
113 et al. 2006; McKittrick et al. 2004), and H3.3 containing nucleosomes can be less stable  
114 than those with H3 (Jin and Felsenfeld 2007; Xu et al. 2010). Although the epigenetic  
115 PTM signature on variant and canonical H3 histones is distinct, the degree to which

116 particular histone PTMs found on both H3 and H3.3 can compensate for one another is  
117 not fully understood. Here, we explore the common and distinct functions of variant and  
118 canonical H3K9 function during *Drosophila* development.

119 H3.3 is associated with transcriptionally active regions of the genome with high  
120 nucleosome turnover, consistent with H3.3 being enriched in “activating” histone PTMs  
121 and depleted in “repressing” histone PTMs (Hake et al. 2006; McKittrick et al. 2004).  
122 One of the histone PTMs enriched on H3.3 relative to H3 is acetylation of lysine nine  
123 (K9ac), a mark associated with accessible chromatin (Hake et al. 2006; McKittrick et al.  
124 2004). Previous studies have identified K9ac at promoters of genes and in regions of  
125 high transcriptional activity (Kharchenko et al. 2011; Bernstein et al. 2005; Liang et al.  
126 2004; Roh et al. 2005). Additionally, mutation of H3K9 acetyltransferases results in  
127 compromised transcriptional output, suggesting K9ac contributes to or is a  
128 consequence of gene expression activation (Wang et al. 1998; Georgakopoulos and  
129 Thireos 1992; Kuo et al. 1998). Importantly, H3K9 acetyltransferases target other  
130 histone residues and have non-histone substrates as well (Glozak et al. 2005; Spange  
131 et al. 2009), indicating that one cannot deduce the function of K9ac solely by mutation  
132 of H3K9 acetyltransferases. For example, whereas mutation of the H3K9  
133 acetyltransferase Rtt109 in budding yeast results in sensitivity to DNA-damaging  
134 agents, H3K9R mutants, which cannot be acetylated by Rtt109, are insensitive to DNA-  
135 damaging agents (Fillingham et al. 2008). Direct investigation of K9ac function in vivo  
136 therefore requires mutation of H3K9 itself. Previously, we used a *Drosophila* histone  
137 gene replacement platform (McKay et al. 2015) to generate a canonical  $H3^{K9R}$  mutant,  
138 and found no significant changes in gene expression at regions of the genome enriched

139 in K9ac (Penke et al. 2016). This observation raises the possibility that H3.3K9ac  
140 functions in gene regulation and can compensate for the absence of H3K9ac.

141 H3.3 is also found at transcriptionally inactive, heterochromatic regions of the  
142 genome (Goldberg et al. 2010; Lewis et al. 2010; Wong et al. 2010). Heterochromatin is  
143 enriched in H3K9 di- and tri-methylation (me<sub>2</sub>/me<sub>3</sub>), modifications that recruit  
144 Heterochromatin Protein 1 (HP1) and are essential for heterochromatin function  
145 (Bannister et al. 2001; Lachner et al. 2001; Nakayama et al. 2001; Penke et al. 2016).  
146 DNA within heterochromatin is composed of repeated sequence elements, many of  
147 which are transcriptionally silent and consist of immobile transposons or transposon  
148 remnants. Using H3.3 mutants it was recently demonstrated that H3.3 is essential for  
149 repression of endogenous retroviral elements and that H3.3 can be methylated at lysine  
150 nine (Elsässer et al. 2015). H3.3K9me<sub>3</sub> is also important for heterochromatin formation  
151 at mouse telomeres (Udugama et al. 2015). These studies did not assess the  
152 contribution of canonical H3K9 because strategies for mutating all replication-dependent  
153 H3 genes in mammalian cells have not been developed. We recently showed in  
154 *Drosophila* that mutation of canonical H3K9 causes defects in heterochromatin  
155 formation and transposon repression (Penke et al. 2016), similar to phenotypes  
156 observed in *C. elegans* in the absence of H3K9 methyltransferases (Zeller et al. 2016).  
157 In addition, we detected low levels of K9me<sub>2</sub>/me<sub>3</sub> in H3<sup>K9R</sup> mutants. Combined, these  
158 data suggest methylated H3.3K9 plays a role in heterochromatin formation and can  
159 compensate for the absence of canonical H3K9. However, the extent of functional  
160 overlap between variant and canonical H3K9 and the intriguing possibility that identical

161 modifications on variant or canonical histones have distinct functions has yet to be fully  
162 investigated.

163 In order to better understand the functions of H3 and H3.3 and to compare the  
164 functions of the variant and canonical H3K9 residues, we used CRISPR-Cas9 to  
165 generate a variant K9R substitution mutation ( $H3.3^{K9R}$ ) in *Drosophila* and combined this  
166 with our previously described canonical  $H3^{K9R}$  mutant (Penke et al. 2016). By comparing  
167 the individual mutant phenotypes of  $H3.3^{K9R}$  and  $H3^{K9R}$  to the combined  $H3.3^{K9R} H3^{K9R}$   
168 mutants using a variety of genomic and cell biological assays, we demonstrate that  
169 variant and canonical versions of H3K9 can compensate for each other, although to  
170 substantially different extents in euchromatin versus heterochromatin. H3K9 plays a  
171 more substantial role than H3.3K9 in heterochromatin formation and in the repression of  
172 transposons, whereas they compensate for each other in controlling euchromatic gene  
173 expression, particularly in regions enriched in the activating modification, K9ac.

174

## 175 MATERIALS AND METHODS

176 **Generation of K9R mutant genotypes:** Variant  $H3.3^{K9R}$  mutants generated by the  
177 cross scheme illustrated in Supplementary Figure 1A were selected by the absence of  
178 GFP fluorescence and/or the presence of straight wings. 1<sup>st</sup> instar larvae from the  
179 variant and canonical  $H3.3^{K9R} H3.2^{K9R}$  cross described in Supplementary Figure 1B  
180 were selected based on the presence of GFP fluorescence. Only larvae that receive the  
181  $H3^{HWT}$  or  $H3^{K9R}$  transgene will survive embryogenesis, as this transgene provides the  
182 only source of canonical histone genes. In Table 2, rows one and two indicate progeny  
183 from the cross  $yw ; H3.3^{2x1} / CyO, twiGFP \times yw ; Df(2L)BSC110 / CyO, twiGFP$ . Rows



184 three and four indicate progeny from the cross  $H3.3B^{K9R}; H3.3^{2x1} / CyO, twiGFP$  x  
185  $H3.3B^{K9R}; Df(2L)BSC110 / CyO, twiGFP$ . In these crosses, the expected ratio of  
186 heterozygous to homozygous  $H3.3A^{2x1}$  animals is 2:1, as  $CyO, twiGFP/CyO, twiGFP$   
187 animals do not eclose as adults.

188 **CRISPR-Cas9 Mutagenesis and Transgene Integration:** A single gRNA targeting  
189  $H3.3B$  near the K9 residue was inserted into pCFD3 and co-injected with a 2 kb  
190 homologous repair template containing the  $H3.3BK9R$  substitution (Supplementary  
191 Experimental Methods). Constructs were injected into embryos expressing Cas9 from  
192 the *nanos* promoter (*nanos-cas9*; Kondo and Ueda 2013). Recovered  $H3.3B^{K9R}$  alleles  
193 were subsequently crossed into  $H3.3A$  null backgrounds ( $H3.3A^{2x1}$  over deficiency  
194  $Df(2L)BSC110$ ). Independent  $H3.3B^{K9R}$  CRISPR alleles were used to generate trans-  
195 heterozygous animals for all experiments. To generate  $H3.3B$  rescue constructs, a 5 kb  
196 genomic sequence containing the entire wild-type  $H3.3B$  transcription unit was PCR  
197 amplified from genomic DNA of *nanos-cas9* flies and cloned into pATTB  
198 (Supplementary Experimental Methods). Gibson assembly (Gibson et al. 2009) using  
199 primers containing K9R or K9Q substitutions was used to generate mutated versions of  
200  $H3.3B$ , and all three constructs were integrated into the 86FB *attP* landing site by  
201  $\Phi C31$ -mediated recombination.

202 **Immunofluorescence:** Salivary gland preparations stained using anti-H3K9me2, anti-  
203 H3K9me3, anti-H3K9ac, or anti-HP1a were performed as previously described (Cai et  
204 al. 2010). Antibody sources and concentrations are included in Supplementary  
205 Experimental Methods. 1<sup>st</sup> instar larval brains were prepared similar to imaginal wing  
206 disc preparations described in Estella et al. (2008).

207 **Western Blots:** ImageJ densitometry analysis was used to determine K9me2, K9ac, or  
208 H3 band intensity (See Supplementary Experimental Methods). Histone modification  
209 signal was normalized to corresponding H3 loading control signal. Normalized signal  
210 from different titrations of the same genotype were averaged and consequent values  
211 were set relative to WT value. This process was completed for two biological replicates  
212 for both K9me2 and K9ac.

213 **Sample Preparation and Sequence Data Analysis:** FAIRE-seq and RNA-seq  
214 samples were prepared from wandering 3<sup>rd</sup> instar imaginal wing discs as previously  
215 described (McKay and Lieb 2013). Sequencing reads were aligned to the dm6 (6.04)  
216 reference genome using Bowtie2 (FAIRE) and Tophat (RNA) default parameters  
217 (Langmead and Salzberg 2012; Trapnell et al. 2014). FAIRE peaks were called with  
218 MACS2 using a shift size of 110bp and a stringency cutoff of 0.01 (Zhang et al. 2008).  
219 Transcripts were assembled with Cufflinks (Trapnell et al. 2014). Bedtools was used to  
220 determine read coverage at peaks and transcripts (Quinlan and Hall 2010) and DESeq2  
221 was used to determine statistical significance ( $p < 0.05$ ) (Love et al. 2014). The following  
222 modENCODE 3<sup>rd</sup> instar larval ChIP-seq data sets were used: K9me2=GSE47260, and  
223 K9me3=GSE47258. K9ac ChIP-seq data from imaginal wings discs was generated by  
224 Pérez-Lluch et al. (GSM1363590, 2015).

225 Chromatin state analysis was performed using data from Kharchenko et al  
226 (2010), which assigns small regions of the genome into one of nine different chromatin  
227 state. FAIRE peaks were classified as one or more chromatin states based on overlap  
228 with regions defined by Kharchenko et al. (2010). Of all the peaks in a particular  
229 chromatin state, we determined the percentage of peaks that had significantly different

230 FAIRE signal in mutant compared to WT samples. RNA chromatin state analysis was  
231 performed in a similar fashion.

232 See Supplemental Experimental Procedures for a detailed description of the  
233 methods. Strains are available upon request. Sequencing data are available at GEO  
234 under accession number GSE106192.

235

## 236 RESULTS

### 237 ***H3.3<sup>K9R</sup> mutant animals are viable but sterile***

238 In order to investigate the role of H3.3K9 in *Drosophila* development and compare it to  
239 the role of H3K9, we first generated an H3.3<sup>K9R</sup> animal by introducing a K9R substitution  
240 at the endogenous *H3.3B* locus using CRISPR/Cas9 and then combining recovered  
241 *H3.3B<sup>K9R</sup>* mutant alleles with a previously generated *H3.3A* null allele (*H3.3A/B*  
242 combined genotype denoted hereafter as *H3.3<sup>K9R</sup>*; see Table 1, Table S1, and Figure  
243 S1A for histone genotype nomenclature) (Sakai et al. 2009). These *H3.3<sup>K9R</sup>* mutants,  
244 which contain the full complement of endogenous canonical *H3* genes, eclose as adults  
245 at the expected Mendelian ratios (Table 2) and appear morphologically normal.  
246 Therefore, canonical H3 can provide all of the H3K9 function during *Drosophila*  
247 development. This result is consistent with a previous study finding that flies without any  
248 H3.3 protein could be propagated as a stock if canonical H3.2 was expressed from a  
249 transgene using the *H3.3B* promoter (Hödl and Basler 2012). Our results are also in  
250 line with a previous report in which *H3.3A* and *H3.3B* null animals containing an  
251 *H3.3A<sup>K9R</sup>* transgene were viable (Sakai et al. 2009). However, whereas these *H3.3A<sup>K9R</sup>*  
252 transgenic animals were fertile (Sakai et al. 2009), we found that animals with an

253 endogenous  $H3.3B^{K9R}$  mutation and the same  $H3.3A$  null allele used by Sakai et al.  
254 (2009) were sterile. The sterility of our  $H3.3^{K9R}$  animals was rescued in both males and  
255 females by a transgene containing the wild-type  $H3.3B$  gene ectopically integrated into  
256 the genome, suggesting that the relative abundance of  $H3.3^{K9R}$  causes sterility (Figure  
257 S2). We conclude that H3.3K9 plays an essential role during gametogenesis and  
258 speculate that different amounts of  $H3.3^{K9R}$  histones from  $H3.3A$  or  $H3.3B$  promoters  
259 may account for the differences between our observations and those of Sakai et al.  
260 (2009).

261

### 262 ***H3.3K9 and H3K9 have overlapping functions during development***

263 We previously observed that canonical  $H3^{K9R}$  mutants could complete development,  
264 although 98% of these mutant animals died during larval or pupal stages (Penke et al.  
265 2016). We considered the possibility that  $H3^{K9R}$  mutant animals progressed to late larval  
266 or pupal stages of development because of compensation by H3.3K9. We therefore  
267 tested if the  $H3.3^{K9R}$  genotype would advance the  $H3^{K9R}$  mutant stage of lethality by  
268 observing the development of animals in which the  $H3.3^{K9R}$  and  $H3^{K9R}$  mutant  
269 genotypes were combined (Table 1, Table S1, and Figure S1B). The  $H3^{K9R}$  genotype  
270 was generated using our previously described histone replacement platform (McKay et  
271 al. 2015; Penke et al. 2016). Briefly, the endogenous array of ~100 canonical histone  
272 gene clusters was deleted and replaced with an ectopically located transgene encoding  
273 a BAC-based, tandem array of 12 canonical histone gene clusters in which the  $H3$   
274 genes contain a K9R mutation (Figure S1B). A 12x tandem array of wild-type, canonical  
275 histone genes (denoted histone wild type or  $H3^{HWT}$ , Figure S1B), which fully rescues

276 deletion of the endogenous histone gene array, was used as a control (McKay et al.  
277 2015). Similar to the  $H3.3^{K9R}$  mutants,  $H3^{HWT}$  animals with the  $H3.3^{K9R}$  mutant genotype  
278 (denoted hereafter as  $H3.3^{K9R} H3^{HWT}$ ; see Table 1 and Figure S1B) were viable (Table  
279 3). However, only 34.6% of  $H3.3^{K9R} H3^{HWT}$  progeny eclosed as adults (Table 3)  
280 compared to essentially 100% of the  $H3.3^{K9R}$  genotype that contained the full  
281 complement of endogenous, wild-type  $H3$  genes (Table 2). This result suggests that in  
282 the presence of fewer total canonical  $H3$  gene copies, the  $H3.3^{K9R}$  mutation is more  
283 detrimental. Importantly, animals with the  $H3.3^{K9R} H3^{K9R}$  combined mutant genotype  
284 containing both the variant and canonical K9R mutation were 100% inviable, dying with  
285 high penetrance at the 1<sup>st</sup> instar larval stage, much earlier than the majority of  $H3^{K9R}$   
286 mutants. These results demonstrate that H3.3K9 can partially compensate for the  
287 absence of H3K9, indicating that H3.3K9 and H3K9 have some redundant functions.

288

### 289 ***H3K9 PTMs are lost in animals lacking H3.3K9 and H3K9***

290 We previously found that K9me2/me3 signal in  $H3^{K9R}$  mutant animals is substantially  
291 reduced but not absent. Thus, a possible reason why  $H3.3^{K9R} H3^{K9R}$  mutants have a  
292 more severe developmental defect than  $H3^{K9R}$  mutants is complete loss of K9me  
293 throughout the genome. We therefore assessed K9me2/me3 levels in  $H3.3^{K9R}$  and  
294  $H3.3^{K9R} H3^{K9R}$  mutants by immunofluorescence. We first assessed K9me2/me3 levels in  
295 salivary gland polytene chromosomes of  $H3.3^{K9R}$  mutants, with the expectation that if  
296 H3.3K9 is methylated the signal will be reduced relative to controls. The salivary gland  
297 is a highly polyploid tissue (>1000C) and the alignment of chromatids in the polytene  
298 chromosomes results in easily visible structures that provide information about levels

299 and genomic locations of histone PTMs using immunofluorescence.  $H3.3^{K9R}$  mutants  
300 had lower levels of both K9me2 and K9me3 compared to wild-type controls at the  
301 largely heterochromatic chromocenter, demonstrating that H3.3K9 is  
302 normally methylated in the pericentric heterochromatin of otherwise wild-type animals  
303 (Figure 1A, B). In support of this result, western blot analysis of salivary glands  
304 demonstrated that K9me2 levels were decreased in  $H3.3^{K9R}$  mutants compared to wild-  
305 type controls (Figure 1D, E).

306 Because  $H3.3^{K9R}$  mutants exhibited reduced K9me2/me3 signal at the  
307 chromocenter, we next used immunofluorescence to examine localization of HP1a,  
308 which binds K9me2/me3. In line with reduced K9me2/me3 signal, HP1a signal at the  
309 chromocenter of  $H3.3^{K9R}$  mutants was reduced compared to wild-type controls  
310 (Figure 1A, C). HP1a and H3.3 also both localize to telomeres (Goldberg et al. 2010;  
311 Lewis et al. 2010). We found that HP1a localizes to telomeres in  $H3.3^{K9R}$  mutants  
312 (Figure 1A), as it does in  $H3^{K9R}$  mutants (Penke et al. 2016). These results are  
313 consistent with previous observations that HP1 recruitment to telomeres requires  
314 telomere binding proteins (Raffa et al. 2011; Vedelek et al. 2015; Badugu et al. 2003)  
315 and not the H3K9 methyltransferase Su(var)3-9 (Perrini et al. 2004), suggesting that  
316 H3K9me is not required for HP1 recruitment to telomeres.

317 Because  $H3.3^{K9R} H3^{K9R}$  combined mutants do not develop to the 3<sup>rd</sup> instar larval  
318 stage, we examined K9me2 levels in 1<sup>st</sup> instar larval brains.  $H3^{K9R}$  mutants (with wild-  
319 type variant histones) and  $H3.3^{K9R} H3^{HWT}$  mutants (with a 12x transgenic complement of  
320 wild-type canonical histone genes) each exhibited reduced K9me2 levels by  
321 immunofluorescence compared to  $H3^{HWT}$  controls, consistent with the polytene

322 chromosome data (Figure 2A). In contrast, the  $H3.3^{K9R} H3^{K9R}$  variant and canonical  
323 combined mutant brains had undetectable levels of K9me2 in the vast majority of cells  
324 (Figure 2A). These results provide further evidence that H3.3K9 is methylated and that  
325 the total amount of K9me is derived from both H3.3 and H3.

326 Interestingly, a small number of cells in the  $H3.3^{K9R} H3^{K9R}$  1<sup>st</sup> instar mutant brains  
327 retained low levels of K9me2 signal at the chromocenter (arrowheads, Figure 2). Cells  
328 with residual K9me2 express ELAV, a pan-neuronal marker, and lack expression of  
329 Deadpan and Prospero, markers of proliferating neuroblasts and ganglion mother cells,  
330 respectively (circles, Figure S3). These data indicate that cells with K9me2 positive  
331 chromocenters in  $H3.3^{K9R} H3^{K9R}$  mutant 1<sup>st</sup> instar larval brains are differentiated  
332 neurons. We suspect that the K9me2 signal in these cells reflects maternally provided  
333 wild-type H3 protein remaining in the genomes of quiescent neurons that differentiated  
334 prior to having their maternal H3 fully replaced by zygotically expressed H3K9R mutant  
335 histones. A corollary to this conclusion is that the proliferating neuroblasts and their  
336 GMC daughters likely have progressed through a sufficient number of S phases such  
337 that replacement of maternal H3 with zygotic H3K9R eliminates detectable K9me2  
338 signal.

339 We also found that levels of H3K9 acetylation were reduced in both the  $H3.3^{K9R}$   
340 mutant and the  $H3^{K9R}$  mutant relative to controls, as determined both by  
341 immunofluorescence of salivary gland polytene chromosomes (Figure 3A, B) and by  
342 western blots of salivary gland extracts (Figure 3C). Because a substantial amount of  
343 K9ac is placed on H3.3, we considered the possibility that lack of K9ac was responsible  
344 for the fertility defects of  $H3.3^{K9R}$  mutants and the early lethality of  $H3.3^{K9R} H3^{K9R}$

345 mutants. To address this question, we integrated either an H3.3B<sup>K9</sup>, an H3.3B<sup>K9R</sup>, or an  
346 H3.3B<sup>K9Q</sup> transgene into the same genomic position in order to determine if a K9Q  
347 acetyl mimic could restore fertility to *H3.3<sup>K9R</sup>* mutants. Animals with only an *H3.3B<sup>K9R</sup>*  
348 mutation at the endogenous locus (i.e., containing a wild-type *H3.3A* gene), and  
349 carrying either an H3.3B<sup>K9R</sup> or H3.3B<sup>K9Q</sup> transgene were sterile, precluding us from  
350 constructing the genotype to test if these transgenes could rescue the sterility of *H3.3<sup>K9R</sup>*  
351 mutant adults (Figure S2). This result suggests that both the H3.3B<sup>K9R</sup> and H3.3B<sup>K9Q</sup>  
352 transgenes acted dominantly to compromise fertility. Furthermore, these data imply that  
353 H3.3B<sup>K9R</sup> and H3.3B<sup>K9Q</sup> histones are incorporated into chromatin.

354

355 ***H3.3K9 regulates chromatin organization at the chromocenter, telomeres, and***  
356 ***transposons***

357 We next asked if the reduction of K9me2/me3 in *H3.3<sup>K9R</sup>* mutants affected chromatin  
358 organization by cytological examination of salivary gland polytene chromosomes using  
359 DAPI staining of DNA. As we found previously in *H3<sup>K9R</sup>* mutants (Penke et al. 2016), in  
360 some *H3.3<sup>K9R</sup>* mutants polytene chromosome spreads the chromocenter appeared  
361 abnormal and not fully condensed (Figure 1F). The cause of this phenotype is unclear  
362 but may reflect altered chromatin organization or defects in the under-replication of  
363 salivary gland pericentric heterochromatin (Belyaeva et al. 1998; Zhimulev et al. 2003).  
364 Based on their cytology, we binned chromocenters into three categories: “organized”,  
365 “moderately organized”, and “disorganized” (Figure 1F). We categorized chromocenters  
366 from four genotypes: wild-type (WT; i.e., with the endogenous canonical histone genes),  
367 an *H3.3A* null mutant (*H3.3A<sup>Null</sup>*), an *H3.3B* K9R substitution mutant (*H3.3B<sup>K9R</sup>*), and the



368 *H3.3B<sup>K9R</sup>* ; *H3.3A<sup>Null</sup>* double mutant in which all H3.3 contains the K9R substitution  
369 (*H3.3<sup>K9R</sup>*) (Table 1, Table S1, and Figure S1A). Whereas the majority of wild-type  
370 chromocenters were organized (60% organized vs 40% moderately organized), both the  
371 *H3.3B<sup>K9R</sup>* and the *H3.3A<sup>Null</sup>* single mutants had increased percentages of moderately  
372 organized and disorganized chromocenters (Figure 1F). For example, ~22% of  
373 chromocenters in the various *H3.3* mutants were disorganized compared to less than  
374 1% of wild-type chromocenters. These results indicate that H3.3 contributes to  
375 chromocenter structure. Interestingly, the *H3.3B<sup>K9R</sup>* ; *H3.3A<sup>Null</sup>* double mutant had the  
376 same proportion of moderately organized and disorganized chromocenters as either  
377 single mutant. This result suggests that either reducing *H3.3* gene dose (i.e., the  
378 *H3.3A<sup>Null</sup>* allele) or expressing K9R mutant H3.3 histones (i.e., the *H3.3B<sup>K9R</sup>* mutation),  
379 can prevent normal H3.3 function at pericentric heterochromatin.

380         Given the disrupted chromocenter structure in *H3.3<sup>K9R</sup>* mutants, we next  
381 examined chromatin structure genome wide by performing Formaldehyde Assisted  
382 Isolation of Regulatory Elements followed by whole genome sequencing (FAIRE-seq).  
383 FAIRE-seq provides a measure of local nucleosome occupancy across the genome,  
384 revealing regions of “open” chromatin that are relatively depleted of nucleosomes  
385 (Simon et al. 2013). We previously found using this technique that regions of  
386 heterochromatin enriched in K9me, particularly pericentromeric heterochromatin, were  
387 more open in canonical *H3<sup>K9R</sup>* mutants relative to *H3<sup>HWT</sup>* controls (Penke et al. 2016). To  
388 determine if variant *H3.3<sup>K9R</sup>* mutants had a similar phenotype we performed FAIRE-seq  
389 in triplicate on imaginal wing discs from wandering 3<sup>rd</sup> instar larvae in *WT*, *H3.3A<sup>Null</sup>* ,  
390 *H3.3B<sup>K9R</sup>* , and *H3.3B<sup>K9R</sup>* ; *H3.3A<sup>Null</sup>* (*H3.3<sup>K9R</sup>*) double mutant genotypes. Sequencing

391 reads were aligned to the genome and peaks were called on each of the three  
392 replicates and combined into a merged peak set. Called peaks were consistent across  
393 replicates and read coverage across peaks was highly correlated ( $R \geq 0.96$ ) (Figure  
394 S4A, B). Additionally, wild-type FAIRE data was consistent with previously generated  
395 data from wing discs (McKay and Lieb 2013) (Figure S4D). *H3.3A<sup>Null</sup>*, *H3.3B<sup>K9R</sup>*, and  
396 *H3.3<sup>K9R</sup>* mutants each had a similar percentage of peaks with significantly altered FAIRE  
397 signal when compared to wild-type: 8.8%, 6.5%, and 7.9% respectively (Figures 4A-C).  
398 Moreover, significantly changed peaks across the three mutants exhibited a high degree  
399 of overlap. Of the 2,660 significantly changed peaks across all mutants, 21% were  
400 shared among all three and 52% by at least two mutants (Figure S5A). FAIRE signal at  
401 significantly changed peaks also displayed similar fold changes in mutants compared to  
402 wild-type and were not exacerbated in the double mutant compared to either single  
403 mutant (Figure S5B). These data suggest H3.3A and H3.3BK9 both function to regulate  
404 chromatin architecture.

405 We next asked if the changes in FAIRE signal we observed in *H3.3* mutants were  
406 characterized by a particular chromatin signature. We assigned each called FAIRE peak  
407 to one of nine different chromatin states characterized by different combinations of  
408 histone PTMs as defined by Kharchenko et al. (2010). We then calculated the  
409 percentage of FAIRE peaks that changed between an *H3.3* mutant and wild-type within  
410 each chromatin state. Regions of K9me2/me3 showed the highest percentage of  
411 changes in FAIRE signal in *H3.3A<sup>Null</sup>*, *H3.3B<sup>K9R</sup>*, and the *H3.3<sup>K9R</sup>* mutant compared to  
412 wild-type, supporting the idea that H3.3K9 is methylated and plays a necessary role in  
413 regulating chromatin architecture (Figure 4D). Changes in FAIRE signal were also more

414 likely to occur in regions of H3K36me3, a mark that is enriched along gene bodies that  
415 are themselves enriched for H3.3 (Bannister et al. 2005; Szenker et al. 2011). Finally,  
416 we used modENCODE K9me2 and K9me3 ChIP-seq data to complement the chromatin  
417 state analysis. Of the FAIRE peaks significantly increased or decreased in  $H3.3^{K9R}$   
418 mutants compared to wild-type, 76.4% and 49.0% respectively overlapped a K9me2 or  
419 K9me3 peak (Figure 4F). These results demonstrate that altered FAIRE signal in  
420  $H3.3^{K9R}$  mutants occurred in regions normally occupied by K9me.

421 We also observed increased FAIRE signal at telomeres in all three  $H3.3$  mutant  
422 genotypes, particularly on chromosomes 2R and 3L (Figure S5C), suggesting that H3.3  
423 regulates telomeric chromatin architecture. In *Drosophila*, telomeres are composed of  
424 retrotransposons enriched in K9me2/me3 (Levis et al. 1993; Cenci et al. 2005). H3.3  
425 plays a similar role in the mouse, in which H3.3 null mutant embryonic stem cells exhibit  
426 an increase in transcripts from transposons (Elsässer et al. 2015) and telomeres  
427 (Udugama et al. 2015). Additionally, we previously observed transposon activation and  
428 mobilization in canonical  $H3^{K9R}$  mutants (Penke et al. 2016). For these reasons, we  
429 examined FAIRE signal at transposons in our  $H3.3$  mutants using the piPipes pipeline,  
430 which avoids ambiguity in aligning reads to repetitive transposons by mapping to  
431 transposon families (Han et al. 2015). Both  $H3.3A^{Null}$  and  $H3.3B^{K9R}$  mutants resulted in  
432 significantly increased FAIRE signal at transposons, and  $H3.3^{K9R}$  mutants had on  
433 average even higher increased FAIRE signal at transposons (Figure 5A, B). Moreover,  
434 FAIRE signal at some telomeric transposons, particularly TART-B, was increased in  
435  $H3.3$  mutants (Figure 5C). However, the extent of increase in  $H3.3^{K9R}$  mutants was not  
436 as severe as previously observed for  $H3^{K9R}$  mutants (Penke et al. 2016) (Figure 5B).

437 These results support a role for H3.3K9 in chromatin-mediated transposon repression,  
438 though to a lesser extent than H3K9.

439

440 ***H3.3K9 and H3K9 functions overlap in regions of K9ac and partially in regions of***  
441 ***K9me***

442 To investigate the cause of lethality when both variant and canonical H3 histones  
443 contain the K9R mutation, we performed RNA-seq of 1<sup>st</sup> instar larvae from four  
444 genotypes:  $H3^{HWT}$ ,  $H3^{K9R}$ ,  $H3.3^{K9R} H3^{HWT}$ , and  $H3.3^{K9R} H3^{K9R}$  (Table 1, Table S1).  
445 Larvae of the correct genotype were identified by GFP fluorescence (see Materials and  
446 Methods). RNA sequencing reads were aligned to the genome using Tophat, transcript  
447 assembly was performed by Cufflinks, and DESeq2 was used for statistical analysis  
448 (Trapnell et al. 2014; Love et al. 2015). Each genotype was verified by examination of  
449 RNA-seq reads mapping to the K9 codon of variant and canonical histones. Correlation  
450 analysis demonstrated transcript abundance across all assembled transcripts was  
451 highly similar among replicates, and was also similar to previously generated data from  
452 wild-type 1<sup>st</sup> instar larvae (Figure S6) (Graveley et al. 2011). Additionally, histone  
453 expression was similar across all genotypes, suggesting that variation in histone levels  
454 do not underlie observed phenotypes (Figure S7A). In line with our previous analysis of  
455  $H3^{K9R}$  RNA-seq data from imaginal wing discs (Penke et al. 2016), the majority of  
456 significantly changed transcripts in  $H3^{K9R}$  1<sup>st</sup> instar samples was increased compared to  
457  $H3^{HWT}$  (247 increased vs 41 decreased), supporting a role for H3K9me in gene silencing  
458 (Figure 6A).  $H3.3^{K9R} H3^{HWT}$  samples had a similar number of significantly changed  
459 transcripts, and again most transcripts showed increased signal compared to  $H3^{HWT}$

460 (203 vs 126), though fold changes were smaller than  $H3^{K9R}$  mutants (Figure 6B). By  
461 contrast, the  $H3.3^{K9R} H3^{K9R}$  combined mutant genotype caused a much more  
462 pronounced effect on gene expression compared to either the  $H3.3^{K9R} H3^{HWT}$  or the  
463  $H3^{K9R}$  mutant genotypes (Figure 6C); 869 transcripts exhibited increased RNA signal  
464 and 1036 transcripts were decreased compared to  $H3^{HWT}$  samples. The number of  
465 decreased transcripts in  $H3.3^{K9R} H3^{K9R}$  animals compared to  $H3^{HWT}$  was therefore about  
466 ten-fold higher than either the variant or canonical K9R mutant alone. Thus, similar to  
467 our viability analysis (Table 3), these RNA-seq results demonstrated that variant and  
468 canonical versions of H3K9 compensate for each other in the regulation of gene  
469 expression.

470       Because we observed increases in FAIRE signal at transposons in  $H3.3^{K9R}$   
471 mutants from wing disc samples, we examined RNA levels of transposon families in 1<sup>st</sup>  
472 instar larvae. Similar to our previous RNA-seq observations from  $H3^{K9R}$  mutant wing  
473 discs (Penke et al. 2016), RNA signal at transposons in  $H3^{K9R}$  1<sup>st</sup> instar larvae was  
474 increased relative to the  $H3^{HWT}$  control (Figure S7B, C). Although on average  
475 transposon levels were only slightly higher in  $H3.3^{K9R} H3^{HWT}$  mutants compared to  
476  $H3^{HWT}$ , transposon levels in  $H3.3^{K9R} H3^{K9R}$  combined mutants were significantly higher  
477 than either  $H3.3^{K9R} H3^{HWT}$  or  $H3^{K9R}$  mutants alone (Figure S7B, C). Moreover, telomeric  
478 transposons are generally increased in all K9R mutants compared to  $H3^{HWT}$  controls  
479 (Figure S7D). Together these results support an overlapping role for H3.3K9 and H3K9  
480 in regulating gene expression and transposon repression.

481       We next examined chromatin signatures of significantly altered transcripts to  
482 explore the mechanism of the observed gene expression changes. All transcripts were

483 assigned to one or more chromatin states based on their overlap with genomic regions  
484 defined by Kharchenko et al. (2010). We then determined the percentage of transcripts  
485 within a given chromatin state that were either increased or decreased in K9R mutants  
486 relative to  $H3^{HWT}$  controls (Figure 7 A-C). Transcripts in regions of K9me2/me3  
487 (chromatin state 7 and 8) were the most likely to have significantly increased RNA  
488 levels in mutants compared to  $H3^{HWT}$ . Although  $H3.3^{K9R} H3^{K9R}$  combined mutants had  
489 the highest percentage of chromatin state 7 transcripts that were significantly increased  
490 (~26%),  $H3^{K9R}$  mutants also displayed a high percentage (~13%) of change within  
491 chromatin state 7 (Figure 7A, D, Figure S8A). These results suggest that H3.3K9  
492 contributes to gene repression in regions of K9me2/me3 but cannot completely  
493 compensate for the absence of H3K9.

494 In contrast to upregulated transcripts, very few transcripts were significantly  
495 decreased in  $H3.3^{K9R} H3^{HWT}$  or  $H3^{K9R}$  mutants. However, the  $H3.3^{K9R} H3^{K9R}$  combined  
496 mutant displayed numerous significant decreases in transcript abundance. Interestingly,  
497 transcripts in chromatin state 1, characterized by K9ac and lack of K9me, were most  
498 likely to be decreased (Figure 7B, E). Several other chromatin states showed elevated  
499 transcript changes, particularly in the  $H3.3^{K9R} H3^{K9R}$  combined mutant; however, in this  
500 analysis transcripts can be assigned to more than one chromatin state. Indeed, many  
501 transcripts in chromatin state 1 also overlap other chromatin states. We therefore  
502 performed a supplementary analysis that examined only transcripts that overlap a single  
503 chromatin state. This analysis demonstrated that transcripts solely in chromatin state 1  
504 were much more likely to change in K9R mutants than those in other chromatin states  
505 (Figure S8A). Similar results were obtained using imaginal wing disc K9ac ChIP data

506 from Pérez-Lluch et al. (2015). Whereas few transcripts that overlapped K9ac were  
507 significantly altered in either single mutant (68 in  $H3^{K9R}$  and 116 in  $H3.3^{K9R} H3^{HWT}$ ),  
508 1195 K9ac associated transcripts exhibited changed expression levels in  $H3.3^{K9R} H3^{K9R}$   
509 combined mutants (Figure 8). These data suggest that in regions of K9ac, H3.3 and H3  
510 can completely compensate for each other. Additionally, these data provide evidence  
511 that K9ac facilitates gene expression.

512

## 513 **DISCUSSION**

### 514 ***Overlapping and distinct developmental functions of H3 and H3.3***

515 In this study, we determined the distinct and overlapping roles that lysine 9 of variant  
516 and canonical histone H3 play in gene expression and heterochromatin function during  
517 *Drosophila* development. Our developmental genetic analyses demonstrate that H3.3K9  
518 is necessary for fertility but not viability in *Drosophila*. In addition, we find that some  
519 euchromatic functions of H3K9 can be provided by either variant H3.3 or canonical H3,  
520 whereas H3.3K9 cannot completely compensate for H3K9 in some regions of  
521 heterochromatin as discussed below.

522 Several studies from multiple species have investigated the developmental  
523 functions of H3.3 and H3. In mice, single mutation of either *H3.3A* or *H3.3B* results in  
524 reduced viability and compromised fertility (Bush et al. 2013; Couldrey et al. 1999).  
525 Similarly, *Drosophila H3.3A* and *H3.3B* double mutants appear at lower than expected  
526 Mendelian ratios and are sterile (Sakai et al. 2009). H3.3 in *Tetrahymena thermophila*  
527 is also important for sexual reproduction, although it is not required for viability or  
528 maintenance of nucleosome density (Cui et al. 2006). Both *Tetrahymena* and

529 *Drosophila* H3.3 and H3 can compensate for one another. In *Tetrahymena*, canonical  
530 H3 is dispensable if H3.3 is overexpressed (Cui et al. 2006). Similarly in *Drosophila*,  
531 transgenic expression of H3 can rescue both the semi-lethality (Sakai et al. 2009) and  
532 infertility (Hödl and Basler 2012) of *H3.3* mutants, indicating some functional  
533 redundancy between the two histones. Indeed, when expressed equivalently,  
534 *Drosophila* H3.3 can provide all of the developmental functions of H3 (Hödl and Basler  
535 2012). Moreover, H3.3 is the sole H3 protein in *S. pombe* and *S. cerevisiae* yeast  
536 (Malik and Henikoff 2003).

537

### 538 ***H3.3K9 functions in heterochromatin***

539 We find that under endogenous expression conditions, H3.3K9 functions in  
540 heterochromatin, including pericentromeric and telomeric regions of the genome. We  
541 detected H3.3K9 methylation in pericentromeric heterochromatin, congruous with  
542 previous data demonstrating that H3.3 in *Drosophila* is deposited at the chromocenter of  
543 polytene chromosomes in a replication-dependent manner (Schwartz and Ahmad  
544 2005). We also observed that *H3.3<sup>K9R</sup>* mutants exhibited an abnormal chromocenter  
545 structure in polytene chromosomes. Moreover, we provide evidence that H3.3K9 is  
546 required for maintenance of telomeric chromatin architecture and repression of certain  
547 telomeric transcripts, indicating that replication-coupled expression of H3 cannot provide  
548 these particular H3K9 functions. These findings in *Drosophila* are consistent with  
549 studies in mouse embryonic stem cells showing that H3.3 is localized to telomeres, is  
550 methylated at K9, and functions in repression of telomeric repeat-containing RNAs  
551 (Goldberg et al. 2010; Udugama et al. 2015). Conversely, the genetic data we



552 presented here and previously (Penke et al. 2016) indicate that H3K9 is essential for  
553 repression of transposon-derived transcripts in pericentric heterochromatin, and H3.3K9  
554 cannot compensate for the lack of H3K9 at these regions of the genome. The role of  
555 H3.3K9 in telomere structure and function may be independent of HP1, as HP1 is  
556 recruited to telomeres via the terminin complex independently of H3K9me (Raffa et al.  
557 2011; Vedelek et al. 2015; Badugu et al. 2003).

558

### 559 ***K9ac regulates euchromatic gene expression***

560 Previous studies that mapped histone modifications across the genome identified K9ac  
561 as a characteristic of transcriptionally active regions (Kharchenko et al. 2011; Bernstein  
562 et al. 2005; Liang et al. 2004; Roh et al. 2005). Moreover, mutation of H3K9  
563 acetyltransferases results in compromised transcriptional activity (Wang et al. 1998;  
564 Georgakopoulos and Thireos 1992; Kuo et al. 1998). However, H3K9 acetyltransferases  
565 have non-histone substrates in addition to H3K9, and decreased transcriptional output  
566 may be the result of pleiotropic effects (Glozak et al. 2005; Spange et al. 2009;  
567 Fillingham et al. 2008). Our study provides evidence that K9ac, rather than non-histone  
568 targets of H3K9 acetyltransferases, contributes to activating transcription, as  $H3.3^{K9R}$   
569 and  $H3^{K9R}$  mutants exhibit reduced gene expression in regions normally enriched for  
570 K9ac. Importantly, these K9ac rich regions with reduced gene expression are not  
571 normally enriched in K9me2 or me3, indicating the observed phenotype is not due to  
572 changes in K9me2 or me3 and likely results from loss of K9ac. This change in gene  
573 expression was accompanied by a fully penetrant lethality early in larval development of  
574  $H3.3^{K9R} H3^{K9R}$  combined mutant animals, raising the possibility that gene expression

575 control via acetylation of H3K9 is critical for the completion of animal development.  
576 These data are also consistent with previous studies in *C. elegans* demonstrating that  
577 H3K9 methylation is not essential for viability (Towbin et al. 2012; Zeller et al. 2016).

578

### 579 ***Overlapping and distinct genomic functions of H3K9 and H3.3K9***

580 Functional overlap of H3K9 and H3.3K9 appears to vary at different regions of the  
581 genome. Whereas H3.3K9 and H3K9 can perform similar functions in euchromatic  
582 regions of the genome and can fully compensate for one another, our RNA-seq data  
583 demonstrate H3.3K9 can only partially compensate for H3K9 in regions of  
584 heterochromatin. Partial compensation by H3.3K9 in regions of K9me2/me3 is in line  
585 with previous studies showing H3.3 is found at heterochromatin (Goldberg et al. 2010;  
586 Lewis et al. 2010; Wong et al. 2010) and plays a role in transposon repression (Elsässer  
587 et al. 2015). In the genotypes we analyzed, mRNA encoding variant and canonical H3  
588 are expressed from their native promoters. Thus, disparity in functional overlap might be  
589 due to differences in modes of expression and deposition and thus total amounts of  
590 variant and canonical H3 histones in particular regions of the genome. For instance, H3  
591 is normally enriched in heterochromatin compared to H3.3 (Ahmad and Henikoff 2002),  
592 which may cause  $H3^{K9R}$  mutations to be more detrimental in these regions. However,  
593 H3.3 may be able to provide all H3 function when highly expressed in a replication-  
594 dependent manner, as a transgenic histone gene array in which the *H3.2* coding region  
595 was replaced by *H3.3* is nearly fully functional in larval imaginal discs (Hödl and Basler  
596 2012). Thus, differences in expression and/or deposition into chromatin may be the only  
597 basis for functional differences between H3.3 and H3.2 that we observed.

598 Heterochromatin may be particularly sensitive to incorporation of non-modifiable  
599 K9 residues. H3K9 methylation serves as a binding site for the protein HP1, which can  
600 in turn recruit H3K9 methyltransferases (Elgin and Reuter 2013; Grewal and Jia 2007).  
601 Methylation of a neighboring nucleosome can restart the cycle and initiate propagation  
602 of a heterochromatic configuration along the chromosome. Introduction of even a small  
603 number of H3K9R containing nucleosomes may therefore disrupt this cycle and prevent  
604 proper heterochromatin formation and gene repression. Incorporation of H3.3B<sup>K9R</sup>  
605 histones into regions of heterochromatin may dominantly affect chromatin structure,  
606 resulting in the observed phenotypes at pericentromeres and telomeres in H3.3<sup>K9R</sup>  
607 mutants. In contrast, incorporation of low amounts of H3K9R histones in euchromatin  
608 may not reduce K9ac levels sufficiently to disrupt gene expression. Finally, amino acid  
609 differences in variant and canonical H3 may direct distinct histone modification states on  
610 different histone types by influencing the binding of chromatin modifying enzymes  
611 (Jacob et al. 2014). Different histone modification states on H3.3 and H3 may underlie  
612 variation in compensation at different genomic regions.

613 In sum, our data investigating H3.3K9 and H3K9 function provide evidence that  
614 K9ac activates gene expression and advance our understanding of the overlapping and  
615 distinct functional roles of variant and canonical histones.

616

617

618

619

620

621 **Figure 1: K9me2/me3 and HP1a signal is decreased in H3.3<sup>K9R</sup> mutants.** A) 3<sup>rd</sup>  
622 instar larval salivary gland polytene chromosome spreads from wild-type (left) and  
623 H3.3<sup>K9R</sup> mutants (right) stained with anti-K9me2, anti-K9me3, anti-HP1a, and DAPI to  
624 mark DNA. Right panel for each genotype shows enlarged chromocenter indicated by  
625 white boxes. Bottom panel shows magnified view of telomere indicated by yellow boxes.  
626 Scale bar = 20 microns (whole polytene) 5 microns (chromocenter/telomere). B, C)  
627 Immunofluorescent signal of K9me2 (B) or HP1a (C) at chromocenters in wild-type (WT)  
628 and H3.3<sup>K9R</sup> mutants (a.u. = arbitrary units). Values were normalized to area of the  
629 chromocenter and set relative to the average WT value from matched slides (see  
630 Supplementary Experimental Methods). Significance was determined using t-test (\*  
631 p<0.05, \*\* p<0.005, \*\*\* p<0.0005). D) Western blot of K9me2 from salivary glands with  
632 H3 used as loading control. E) K9me2 signal was quantified by densitometry and  
633 normalized to corresponding H3 loading control band. Normalized values were set  
634 relative to WT normalized signal. Error bars represent standard error of the mean from  
635 two independent biological replicates (see Materials and Methods). F) Quantification of  
636 chromocenter organization from *WT*, *H3.3<sup>K9R</sup>*, *H3.3A<sup>Null</sup>*, *H3.3B<sup>K9R</sup>* mutants.

637  
638 **Figure 2: K9me2/me3 signal is diminished in K9R mutants.** A) 1<sup>st</sup> instar larval brains  
639 stained with anti-K9me2 and DAPI to mark DNA from *H3<sup>HWT</sup>*, *H3<sup>K9R</sup>*, *H3.3<sup>K9R</sup>* *H3<sup>HWT</sup>*, and  
640 *H3.3<sup>K9R</sup>* *H3<sup>K9R</sup>* animals. Left panel shows max projection of 2 micrometer confocal  
641 sections through the entire brain. Right panel shows a magnified, single confocal  
642 section from the area indicated by the white boxes. Arrowheads indicate cells with

643 residual K9me2 signal in  $H3.3^{K9R}$   $H3^{K9R}$  animals. Scale bar = 50 microns (whole brain)  
644 10 microns (enlarged image).

645

646 **Figure 3: K9ac signal is decreased in  $H3.3^{K9R}$  mutants.** A,B) Polytene chromosome  
647 spreads from wild-type (*WT*) and  $H3.3^{K9R}$  mutants (A) or  $H3^{HWT}$  and  $H3^{K9R}$  mutants (B)  
648 stained with anti-K9me2, anti-K9ac, anti-HP1a, and DAPI to mark DNA. Scale bar = 20  
649 microns. C) Western blot of K9ac from salivary glands with H3 used as loading control.  
650 K9ac signal was quantified by densitometry and normalized to corresponding H3  
651 loading control band. Normalized values were set relative to WT normalized signal.  
652 Error bars represent standard error of the mean from two independent biological  
653 replicates (see Materials and Methods).

654

655 **Figure 4:  $H3.3K9$  regulates chromatin architecture in regions of K9me.** A-C)  
656 Mutant: WT ratio of  $H3.3A^{null}$  (A),  $H3.3B^{K9R}$  (B), or  $H3.3^{K9R}$  (C) FAIRE signal from 3<sup>rd</sup>  
657 instar imaginal wing discs at 19,738 FAIRE peaks called by MACS2. Red dots indicate  
658 significantly different peaks ( $p < 0.05$ ), and insets indicate the number of significantly  
659 increased (top) or decreased (bottom) peaks. Average counts signify average  
660 normalized reads that overlap a peak in mutant and WT samples. D) Percentage of  
661 peaks in a particular chromatin state that have significantly different FAIRE signal in  
662 mutants versus WT (top). Bottom panel shows a summary of histone modifications or  
663 proteins that define a chromatin state and the number of FAIRE peaks assigned to a  
664 given chromatin state. E) Boxplot of FAIRE enrichment over input at 126 transposon

665 families (\* indicates  $p < 0.05$  and \*\*\* indicates  $p < 0.0005$ ). F) Plot from C showing only  
666 those peaks that overlap an K9me2 or K9me3 peak from modENCODE ChIP-seq data.

667

668 **Figure 5: Imaginal wing disc FAIRE signal of *H3.3* mutants is increased at**

669 **telomeres and transposons.** A) Boxplot of average FAIRE enrichment determined by

670 piPipes pipeline across 126 transposon families (Han et al. 2015). Genomic DNA from

671 *Drosophila* embryos used as input control. B) Boxplots in A shown alongside FAIRE

672 enrichment for *H3<sup>HWT</sup>* and *H3<sup>K9R</sup>* mutants from a separate experiment (Penke et al.

673 2016). C) FAIRE enrichment of *H3.3* and *H3<sup>K9R</sup>* mutants at telomeric transposons. Error

674 bars indicate standard deviation from three replicates for each genotype. Statistical

675 significance determined by paired t-test ( $p < 0.05$  \*,  $p < 0.005$  \*\*,  $p < 0.0005$  \*\*\*, n.s. = not

676 significant).

677

678 **Figure 6: *H3.3K9* and *H3K9* redundantly regulate gene expression.** A-C) Mutant:

679 WT ratio of *H3<sup>K9R</sup>* (A), *H3.3<sup>K9R</sup>* (B), or *H3.3<sup>K9R</sup> H3<sup>K9R</sup>* (C) RNA signal from 1<sup>st</sup> instar

680 larvae at 10,253 transcripts assembled by Cufflinks. The Y axis indicates the  $\log_2$

681 transformation of mutant/control signal between the genotypes being compared

682 (indicated at the top of each plot). Red dots indicate significantly different transcripts

683 ( $p < 0.05$ ) and insets signify the number of significantly increased (top) or decreased

684 (bottom) transcripts. Average coverage signifies the average number of normalized

685 reads that overlap a transcript in mutant and *H3<sup>HWT</sup>* samples.

686

687 **Figure 7: H3.3K9 and H3K9 redundancy differs in heterochromatin and**  
688 **euchromatin.** A, B) Percentage of transcripts in a chromatin state that have  
689 significantly increased (A) or decreased (B) RNA signal in mutants versus  $H3^{HWT}$ . C)  
690 Table indicates the number of transcripts that overlap a particular chromatin state. D, E)  
691 Heatmaps showing fold change of K9R mutants over  $H3^{HWT}$  at chromatin state 7  
692 regions (D) and chromatin state 1 regions (E). Each row indicates a transcript that  
693 overlaps the indicated chromatin state.

694  
695 **Figure 8: K9ac associated transcripts are altered in  $H3.3^{K9R}$   $H3^{K9R}$  double mutants.**  
696 MA plot showing fold change of normalized RNA signal in  $H3^{K9R}$  (A),  $H3.3^{K9R}$   $H3^{HWT}$  (B),  
697 and  $H3.3^{K9R}$   $H3^{K9R}$  (C) mutants versus  $H3^{HWT}$  at all transcripts from merged  
698 transcriptome. Average coverage on X-axis represents the mean expression level of a  
699 transcript. Transcripts that overlap an K9ac peak called from ChIP-seq data  
700 (GSM1363590 ; Pérez-Lluch et al. 2015) are shown in the left panel while those that do  
701 not are shown in the right panel. Significance (shown in red) was determined using  
702 DESeq2 (Love et al. 2015) and an adjusted p value cutoff of 0.05.

703

704

## 705 **Acknowledgement**

706 We thank Bhawana Bariar for assistance generating the gRNA construct, Jeff Sekelsky  
707 for the pBlueSurf construct, and Kami Ahmad for providing the  $H3.3A^{2x1}$  flies. This work  
708 was supported by 5T32GM007092-39 and F31GM115194 to T.J.R.P and  
709 R01DA036897 to D.J.M, B.D.S, A.G.M, and R.J.D.

710

711 **REFERENCES**

- 712 Ahmad K, Henikoff S. 2002. The histone variant H3.3 marks active chromatin by  
713 replication-independent nucleosome assembly. *Mol Cell* **9**: 1191–1200.
- 714 Allis CD, Wiggins JC. 1984. Histone rearrangements accompany nuclear differentiation  
715 and dedifferentiation in Tetrahymena. *Dev Biol* **101**: 282–294.
- 716 Badugu RK, Shareef MM, Kellum R. 2003. Novel Drosophila Heterochromatin Protein I  
717 (HP1)/Origin Recognition Complex-associated Protein (HOAP) Repeat Motif in  
718 HP1/HOAP Interactions and Chromocenter Associations. *J Biol Chem* **278**: 34491–  
719 34498.
- 720 Bannister a J, Zegerman P, Partridge JF, Miska E a, Thomas JO, Allshire RC,  
721 Kouzarides T. 2001. Selective recognition of methylated lysine 9 on histone H3 by  
722 the HP1 chromo domain. *Nature* **410**: 120–4.
- 723 Bannister AJ, Schneider R, Myers FA, Thorne AW, Crane-Robinson C, Kouzarides T.  
724 2005. Spatial distribution of di- and tri-methyl lysine 36 of histone H3 at active  
725 genes. *J Biol Chem* **280**: 17732–17736.
- 726 Belyaeva ES, Zhimulev IF, Volkova EI, Alekseyenko a a, Moshkin YM, Koryakov DE.  
727 1998. Su(UR)ES: a gene suppressing DNA underreplication in intercalary and  
728 pericentric heterochromatin of Drosophila melanogaster polytene chromosomes.  
729 *Proc Natl Acad Sci U S A* **95**: 7532–7.
- 730 Bernstein BE, Kamal M, Lindblad-Toh K, Bekiranov S, Bailey DK, Huebert DJ,  
731 McMahon S, Karlsson EK, Kulbokas EJ, Gingeras TR, et al. 2005. Genomic maps  
732 and comparative analysis of histone modifications in human and mouse. *Cell* **120**:  
733 169–181.



- 734 Blower MD, Karpen GH. 2001. The role of Drosophila CID in kinetochore formation, cell-  
735 cycle progression and heterochromatin interactions. *Nat Cell Biol* **3**: 730–9.
- 736 Bush KM, Yuen BT, Barrilleaux BL, Riggs JW, O'Geen H, Cotterman RF, Knoepfler PS.  
737 2013. Endogenous mammalian histone H3.3 exhibits chromatin-related functions  
738 during development. *Epigenetics Chromatin* **6**: 7.
- 739 Cai W, Jin Y, Girton J, Johansen J, Johansen KM. 2010. Preparation of Drosophila  
740 Polytene Chromosome Squashes for Antibody Labeling. *Jove* 2–5.
- 741 Cenci G, Ciapponi L, Gatti M. 2005. The mechanism of telomere protection: A  
742 comparison between Drosophila and humans. *Chromosoma* **114**: 135–145.
- 743 Couldrey C, Carlton MB, Nolan PM, Colledge WH, Evans MJ. 1999. A retroviral gene  
744 trap insertion into the histone 3.3A gene causes partial neonatal lethality, stunted  
745 growth, neuromuscular deficits and male sub-fertility in transgenic mice. *Hum Mol*  
746 *Genet* **8**: 2489–2495.
- 747 Cui B, Liu Y, Gorovsky MA. 2006. Deposition and function of histone H3 variants in  
748 *Tetrahymena thermophila*. *Mol Cell Biol* **26**: 7719–30.
- 749 Elgin SCR, Reuter G. 2013. Position-effect variegation, heterochromatin formation, and  
750 gene silencing in Drosophila. *Cold Spring Harb Perspect Biol* **5**.
- 751 Elsässer SJ, Noh K-M, Diaz N, Allis CD, Banaszynski L a. 2015. Histone H3.3 is  
752 required for endogenous retroviral element silencing in embryonic stem cells.  
753 *Nature* **522**: 240–246.
- 754 Estella C, McKay DJ, Mann RS. 2008. Molecular Integration of Wingless,  
755 Decapentaplegic, and Autoregulatory Inputs into Distalless during Drosophila Leg  
756 Development. *Dev Cell* **14**: 86–96.

- 757 Fillingham J, Recht J, Silva AC, Suter B, Emili A, Stagljar I, Krogan NJ, Allis CD, Keogh  
758 M-C, Greenblatt JF. 2008. Chaperone control of the activity and specificity of the  
759 histone H3 acetyltransferase Rtt109. *Mol Cell Biol* **28**: 4342–53.
- 760 Georgakopoulos T, Thireos G. 1992. Two distinct yeast transcriptional activators require  
761 the function of the GCN5 protein to promote normal levels of transcription. *EMBO J*  
762 **11**: 4145–52.
- 763 Gibson DG, Young L, Chuang R-Y, Venter JC, Hutchison C a, Smith HO, Iii CAH,  
764 America N. 2009. Enzymatic assembly of DNA molecules up to several hundred  
765 kilobases. *Nat Methods* **6**: 343–5.
- 766 Glozak MA, Sengupta N, Zhang X, Seto E. 2005. Acetylation and deacetylation of non-  
767 histone proteins. *Gene* **363**: 15–23.
- 768 Goldberg AD, Banaszynski LA, Noh K, Lewis PW, Elsaesser SJ, Stadler S, Dewell S,  
769 Law M, Guo X, Li X, et al. 2010. Distinct Factors Control Histone at Specific  
770 Genomic Regions. *Cell* **140**: 678–691.
- 771 Graveley BR, Brooks AN, Carlson JW, Duff MO, Landolin JM, Yang L, Artieri CG, Baren  
772 MJ Van, Boley N, Booth BW, et al. 2011. The Developmental Transcriptome of  
773 *Drosophila melanogaster*. *Nature* **471**: 473–479.
- 774 Grewal SIS, Jia S. 2007. Heterochromatin revisited. *Nat Rev Genet* **8**: 35–46.
- 775 Hake SB, Garcia BA, Duncan EM, Kauer M, Dellaire G, Shabanowitz J, Bazett-jones  
776 DP, Allis CD, Hunt DF. 2006. Expression Patterns and Post-translational  
777 Modifications Associated with Mammalian Histone H3 Variants. *J Biol Chem* **281**:  
778 559–568.
- 779 Han BW, Wang W, Zamore PD, Weng Z. 2015. PiPipes: A set of pipelines for piRNA

780 and transposon analysis via small RNA-seq, RNA-seq, degradome-and CAGE-seq,  
781 ChIP-seq and genomic DNA sequencing. *Bioinformatics* **31**: 593–595.

782 Henikoff S, Ahmad K. 2005. Assembly of Variant Histones into Chromatin. *Annu Rev*  
783 *Cell Dev Biol*.

784 Hödl M, Basler K. 2012. Transcription in the Absence of Histone H3.2 and H3K4  
785 Methylation. *Curr Biol* 2253–2257.

786 Jacob Y, Bergamin E, Donoghue MT a, Mongeon V, LeBlanc C, Voigt P, Underwood  
787 CJ, Brunzelle JS, Michaels SD, Reinberg D, et al. 2014. Selective methylation of  
788 histone H3 variant H3.1 regulates heterochromatin replication. *Science* **343**: 1249–  
789 53.

790 Jin C, Felsenfeld G. 2007. Nucleosome stability mediated by histone variants H3.3 and  
791 H2A.Z. *Genes Dev* 1519–1529.

792 Jin C, Zang C, Wei G, Cui K, Peng W, Zhao K, Felsenfeld G, Heart TN. 2011.  
793 H3.3/H2A.Z double variant-containing nucleosomes mark “nucleosome-free  
794 regions” of active promoters and other regulatory regions in the human genome.  
795 *Nat Genet* **41**: 941–945.

796 Kharchenko P, Alekseyenko A, Schwartz YB, Minoda A, Riddle NC, Sabo PJ, Larschan  
797 EN, Gorchakov AA, Karpen GH, Park PJ. 2011. Comprehensive analysis of the  
798 chromatin landscape in *Drosophila melanogaster*. *Nature* **471**: 480–485.

799 Kondo S, Ueda R. 2013. Highly Improved gene targeting by germline-specific Cas9  
800 expression in *Drosophila*. *Genetics* **195**: 715–721.

801 Kraushaar DC, Jin W, Maunakea A, Abraham B, Ha M, Zhao K. 2013. Genome-wide  
802 incorporation dynamics reveal distinct categories of turnover for the histone variant

- 803 H3 . 3. *Genome Biol* **14**: 1.
- 804 Kuo M-H, Zhou J, Jambeck P, Churchill MEA, Allis CD. 1998. Histone acetyltransferase  
805 activity of yeast Gcn5p is required for the activation of target genes in vivo. *Genes*  
806 *Dev* **12**: 627–639.
- 807 Lachner M, O'Carroll D, Rea S, Mechtler K, Jenuwein T. 2001. Methylation of histone  
808 H3 lysine 9 creates a binding site for HP1 proteins. *Nature* **410**: 116–120.
- 809 Langmead B, Salzberg SL. 2012. Fast gapped-read alignment with Bowtie 2. *Nat*  
810 *Methods* **9**: 357–360.
- 811 Levis RW, Ganesan R, Houtchens K, Tolar LA, Sheen F miin. 1993. Transposons in  
812 place of telomeric repeats at a Drosophila telomere. *Cell* **75**: 1083–1093.
- 813 Lewis PW, Elsaesser SJ, Noh K, Stadler SC, Allis CD. 2010. Daxx is an H3.3-specific  
814 histone chaperone and cooperates with ATRX in replication-independent chromatin  
815 assembly at telomeres. *PNAS* **107**: 1–6.
- 816 Liang G, Lin JCY, Wei V, Yoo C, Cheng JC, Nguyen CT, Weisenberger DJ, Egger G,  
817 Takai D, Gonzales FA, et al. 2004. Distinct localization of histone H3 acetylation  
818 and H3-K4 methylation to the transcription start sites in the human genome. *Proc*  
819 *Natl Acad Sci* **101**: 7357–7362.
- 820 Love M, Anders S, Huber W. 2015. *Differential analysis of count data – the DESeq2*  
821 *package*.
- 822 Love MI, Huber W, Anders S. 2014. Moderated estimation of fold change and  
823 dispersion for RNA-seq data with DESeq2. *Genome Biol* 1–21.
- 824 Malik HS, Henikoff S. 2003. Phylogenomics of the nucleosome. *Nat Struct Biol* **10**: 882–  
825 91.

- 826 Marzluff WF, Gongidi P, Woods KR, Jin J, Maltais LJ. 2002. The Human and Mouse  
827 Replication-Dependent Histone Genes. *Genomics* **80**: 487–498.
- 828 McKay DJ, Klusza S, Penke TJR, Meers MP, Curry KP, McDaniel SL, Malek PY,  
829 Cooper SW, Tatomer DC, Lieb JD, et al. 2015. Interrogating the Function of  
830 Metazoan Histones using Engineered Gene Clusters. *Dev Cell* **32**: 373–386.
- 831 McKay DJ, Lieb JD. 2013. A Common Set of DNA Regulatory Elements Shapes  
832 *Drosophila* Appendages. *Dev Cell* **27**: 306–318.
- 833 McKittrick E, Gafken PR, Ahmad K, Henikoff S. 2004. Histone H3.3 is enriched in  
834 covalent modifications associated with active chromatin. *Proc Natl Acad Sci U S A*  
835 **101**: 1525–30.
- 836 Mellone BG, Allshire RC. 2003. Stretching it: putting the CEN(P-A) in centromere. *Curr*  
837 *Opin Genet Dev* **13**: 191–198.
- 838 Mito Y, Henikoff JG, Henikoff S. 2005. Genome-scale profiling of histone H3.3  
839 replacement patterns. *Nat Genet* **37**.
- 840 Nakayama J, Rice JC, Strahl BD, Allis CD, Grewal SIS. 2001. Role of Histone H3  
841 Lysine 9 Methylation in Epigenetic Control of Heterochromatin Assembly. *Science*  
842 (80- ) **292**: 110–113.
- 843 Penke TJR, McKay DJ, Strahl BD, Gregory Matera A, Duronio RJ. 2016. Direct  
844 interrogation of the role of H3K9 in metazoan heterochromatin function. *Genes Dev*  
845 **30**: 1866–1880.
- 846 Pérez-Lluch S, Blanco E, Tilgner H, Curado J, Ruiz-Romero M, Corominas M, Guigó R.  
847 2015. Absence of canonical marks of active chromatin in developmentally regulated  
848 genes. *Nat Genet* **47**: 1158–67.

- 849 Perrini B, Piacentini L, Fanti L, Altieri F, Chichiarelli S, Berloco M, Turano C, Ferraro A,  
850 Pimpinelli S. 2004. HP1 controls telomere capping, telomere elongation, and  
851 telomere silencing by two different mechanisms in *Drosophila*. *Mol Cell* **15**: 467–  
852 476.
- 853 Price BD, Andrea ADD. 2014. Chromatin Remodeling at DNA Double Strand Breaks.  
854 *Cell* **152**: 1344–1354.
- 855 Quinlan AR, Hall IM. 2010. BEDTools: a flexible suite of utilities for comparing  
856 genomic features. *Bioinformatics* **26**: 841–842.
- 857 Raffa GD, Ciapponi L, Cenci G, Gatti M. 2011. Terminin: A protein complex that  
858 mediates epigenetic maintenance of *Drosophila* telomeres. *Nucleus* **2**: 383–391.
- 859 Roh T, Cuddapah S, Zhao K. 2005. Active chromatin domains are defined by  
860 acetylation islands revealed by genome-wide mapping -- Roh et al. 19 (5): 542 --  
861 *Genes and Development*. 542–552.
- 862 Sakai A, Schwartz BE, Goldstein S, Ahmad K. 2009. Transcriptional and developmental  
863 functions of the H3.3 histone variant in *Drosophila*. *Curr Biol* **19**: 1816–20.
- 864 Schwartz BE, Ahmad K. 2005. Transcriptional activation triggers deposition and  
865 removal of the histone variant H3 . 3. *Genes Dev* 804–814.
- 866 Scully R, Xie A. 2013. Double strand break repair functions of histone H2AX. *Mutat Res*  
867 **750**: 5–14.
- 868 Simon JM, Giresi PG, Davis IJ, Lieb JD. 2013. A detailed protocol for formaldehyde-  
869 assisted isolation of regulatory elements (FAIRE). *Curr Protoc Mol Biol* **Chapter 21**:  
870 Unit21.26.
- 871 Spange S, Wagner T, Heinzl T, Krämer OH. 2009. Acetylation of non-histone proteins

872 modulates cellular signalling at multiple levels. *Int J Biochem Cell Biol* **41**: 185–198.

873 Szenker E, Ray-Gallet D, Almouzni G. 2011. The double face of the histone variant  
874 H3.3. *Cell Res* **21**: 421–434.

875 Tagami H, Ray-Gallet D, Almouzni G, Nakatani Y. 2004. Histone H3.1 and H3.3  
876 Complexes Mediate Nucleosome Assembly Pathways Dependent or Independent  
877 of DNA Synthesis. *Cell* **116**: 51–61.

878 Talbert PB, Henikoff S. 2010. Histone variants--ancient wrap artists of the epigenome.  
879 *Nat Rev Mol Cell Biol* **11**: 264–275.

880 Talbert PB, Henikoff S. 2017. Histone variants on the move: substrates for chromatin  
881 dynamics. *Nat Rev Mol Cell Biol* **18**: 115–126.

882 Tamura T, Smith M, Kanno T, Dasenbrock H, Nishiyama A, Ozato K. 2009. Inducible  
883 deposition of the histone variant H3.3 in interferon-stimulated genes. *J Biol Chem*  
884 **284**: 12217–12225.

885 Towbin BD, González-Aguilera C, Sack R, Gaidatzis D, Kalck V, Meister P, Askjaer P,  
886 Gasser SM. 2012. Step-wise methylation of histone H3K9 positions  
887 heterochromatin at the nuclear periphery. *Cell* **150**: 934–47.

888 Trapnell C, Roberts A, Goff L, Pertea G, Kim D, Kelley DR, Pimentel H, Salzberg SL,  
889 Rinn JL, Pachter L. 2014. Differential gene and transcript expression analysis of  
890 RNA-seq experiments with TopHat and Cufflinks. *Nat Protoc*.

891 Udugama M, Chang FTM, Chan FL, Tang MC, Pickett H a, McGhie JDR, Mayne L,  
892 Collas P, Mann JR, Wong LH. 2015. Histone variant H3.3 provides the  
893 heterochromatic H3 lysine 9 tri-methylation mark at telomeres. *Nucleic Acids Res*  
894 gkv847-.

- 895 Vedelek B, Blastyák A, Boros IM. 2015. Cross-species interaction between rapidly  
896 evolving telomere-specific drosophila proteins. *PLoS One* **10**: 1–16.
- 897 Verreault A, Kaufman PD, Kobayashi R, Stillman B. 1996. Nucleosome assembly by a  
898 complex of CAF-1 and acetylated histones H3/H4. *Cell* **87**: 95–104.
- 899 Wallrath LL, Vitalini MW, Elgin SCR. 2014. Fundamentals of Chromatin eds. J.L.  
900 Workman and S.M. Abmayr. 529–552.
- 901 Wang L, Liu L, Berger SL. 1998. Critical residues for histone acetylation by Gcn5,  
902 functioning in Ada and SAGA complexes, are also required for transcriptional  
903 function in vivo. *Genes Dev* 640–653.
- 904 Wong LH, Mcghie JD, Sim M, Anderson MA, Ahn S, Hannan RD, George AJ, Morgan  
905 KA, Mann JR, Choo KHA. 2010. ATRX interacts with H3.3 in maintaining telomere  
906 structural integrity in pluripotent embryonic stem cells. *Genome Res* 351–360.
- 907 Xu M, Long C, Chen X, Huang C, Chen S, Zhu B. 2010. Partitioning of Histone H3-H4  
908 Tetramers During DNA Replication-Dependent Chromatin Assembly. *Science (80-*  
909 **328**: 94–98.
- 910 Zeller P, Padeken J, Schendel R Van, Kalck V, Tijsterman M, Gasser SM. 2016.  
911 Histone H3K9 methylation is dispensable for *Caenorhabditis elegans* development  
912 but suppresses RNA $\square$ : DNA hybrid-associated repeat instability. *Nat Genet* 1–13.
- 913 Zhang Y, Liu T, Meyer CA, Eeckhoute J, Johnson DS, Bernstein BE, Nusbaum C,  
914 Myers RM, Brown M, Li W, et al. 2008. Open Access Model-based Analysis of  
915 ChIP-Seq (MACS). *Genome Biol* **9**.
- 916 Zhimulev IF, Belyaeva ES, Semeshin VF, Shloma V V, Makunin I V, Volkova EI. 2003.  
917 Overexpression of the SuUR gene induces reversible modifications at pericentric,



918 telomeric and intercalary heterochromatin of *Drosophila melanogaster* polytene  
919 chromosomes. *J Cell Sci* **116**: 169–76.

920

921

922

923

924

925

**Table 1: Genotype description of H3.3 and H3 K9R mutants.**

| Nomenclature <sup>a</sup>                  | Canonical Histone Genotypes |            | Variant Histone Genotypes |       |
|--------------------------------------------|-----------------------------|------------|---------------------------|-------|
|                                            | Endogenous                  | Transgenic | H3.3B                     | H3.3A |
| <i>WT</i>                                  | WT                          | -          | WT                        | WT    |
| <i>H3.3B<sup>K9R</sup></i>                 | WT                          | -          | K9R                       | WT    |
| <i>H3.3A<sup>Null</sup></i>                | WT                          | -          | WT                        | Δ     |
| <i>H3.3<sup>K9R</sup></i>                  | WT                          | -          | K9R                       | Δ     |
| <i>H3<sup>HWT</sup></i>                    | Δ                           | WT         | WT                        | WT    |
| <i>H3<sup>K9R</sup></i>                    | Δ                           | K9R        | WT                        | WT    |
| <i>H3.3<sup>K9R</sup> H3<sup>HWT</sup></i> | Δ                           | WT         | K9R                       | Δ     |
| <i>H3.3<sup>K9R</sup> H3<sup>K9R</sup></i> | Δ                           | K9R        | K9R                       | Δ     |

<sup>a</sup> Wild-type (WT), gene deletion (Δ), no transgenic histone array (-). See Supplementary Table 1 for full genotypes.

**Table 2: *H3.3<sup>K9R</sup>* mutants are viable but sterile.**

| <i>H3.3B</i> | <i>H3.3A</i> <sup>a</sup> | Observed         | Expected | p <sup>b</sup> | Fertile         |
|--------------|---------------------------|------------------|----------|----------------|-----------------|
| <i>WT</i>    | Δ/+                       | 535              | 535.3    | n.s.           | yes             |
| <i>WT</i>    | Δ                         | 268              | 267.7    | n.s.           | yes             |
| <i>K9R</i>   | Δ/+                       | 400              | 438      | <0.005         | yes             |
| <i>K9R</i>   | Δ                         | 257 <sup>c</sup> | 219      | <0.005         | No <sup>d</sup> |

<sup>a</sup> *H3.3A<sup>2x1</sup>* deletion allele

<sup>b</sup> p-value calculated with a chi-square test

<sup>c</sup> The higher than expected number of observed *H3.3B<sup>K9R</sup> H3.3A<sup>Null</sup>* animals is presumably due to non-specific detrimental effects caused by the presence of a balancer chromosome in siblings with the *H3.3B<sup>K9R</sup>* mutation and balancer-derived wild-type *H3.3A*.

<sup>d</sup> Both males and females.

**Table 3:  $H3.3^{K9R}$  and  $H3^{K9R}$  mutations are synthetically lethal.**

| Genotype              | Embryo Hatching |     |      |                | Pupate <sup>a</sup> |     |      |         | Eclose |     |      |         |
|-----------------------|-----------------|-----|------|----------------|---------------------|-----|------|---------|--------|-----|------|---------|
|                       | Obs             | No. | %    | p <sup>b</sup> | Obs                 | No. | %    | p       | Obs    | No. | %    | p       |
| $H3^{HWT}$            | 389             | 450 | 86.4 | -              | 98                  | 140 | 70.0 | -       | 88     | 140 | 62.9 | -       |
| $H3^{K9R}$            | 370             | 480 | 77.1 | <0.0005        | 183                 | 285 | 64.2 | <0.05   | 3      | 285 | 1.1  | <0.0005 |
| $H3.3^{K9R} H3^{HWT}$ | 350             | 465 | 75.3 | <0.0005        | 279                 | 462 | 60.4 | <0.0005 | 160    | 462 | 34.6 | <0.0005 |
| $H3.3^{K9R} H3^{K9R}$ | 214             | 325 | 65.8 | <0.0005        | 0                   | 130 | 0.0  | <0.0005 | 0      | 130 | 0.0  | <0.0005 |

<sup>a</sup> The pupation and eclosion values have an identical number of animals analyzed for each genotype because they were obtained from the same brood of animals, while the embryo hatching values were obtained from independent experiments.

<sup>b</sup> p-value calculated with a chi-square test using  $H3^{HWT}$  observed (Obs) values as expected values.

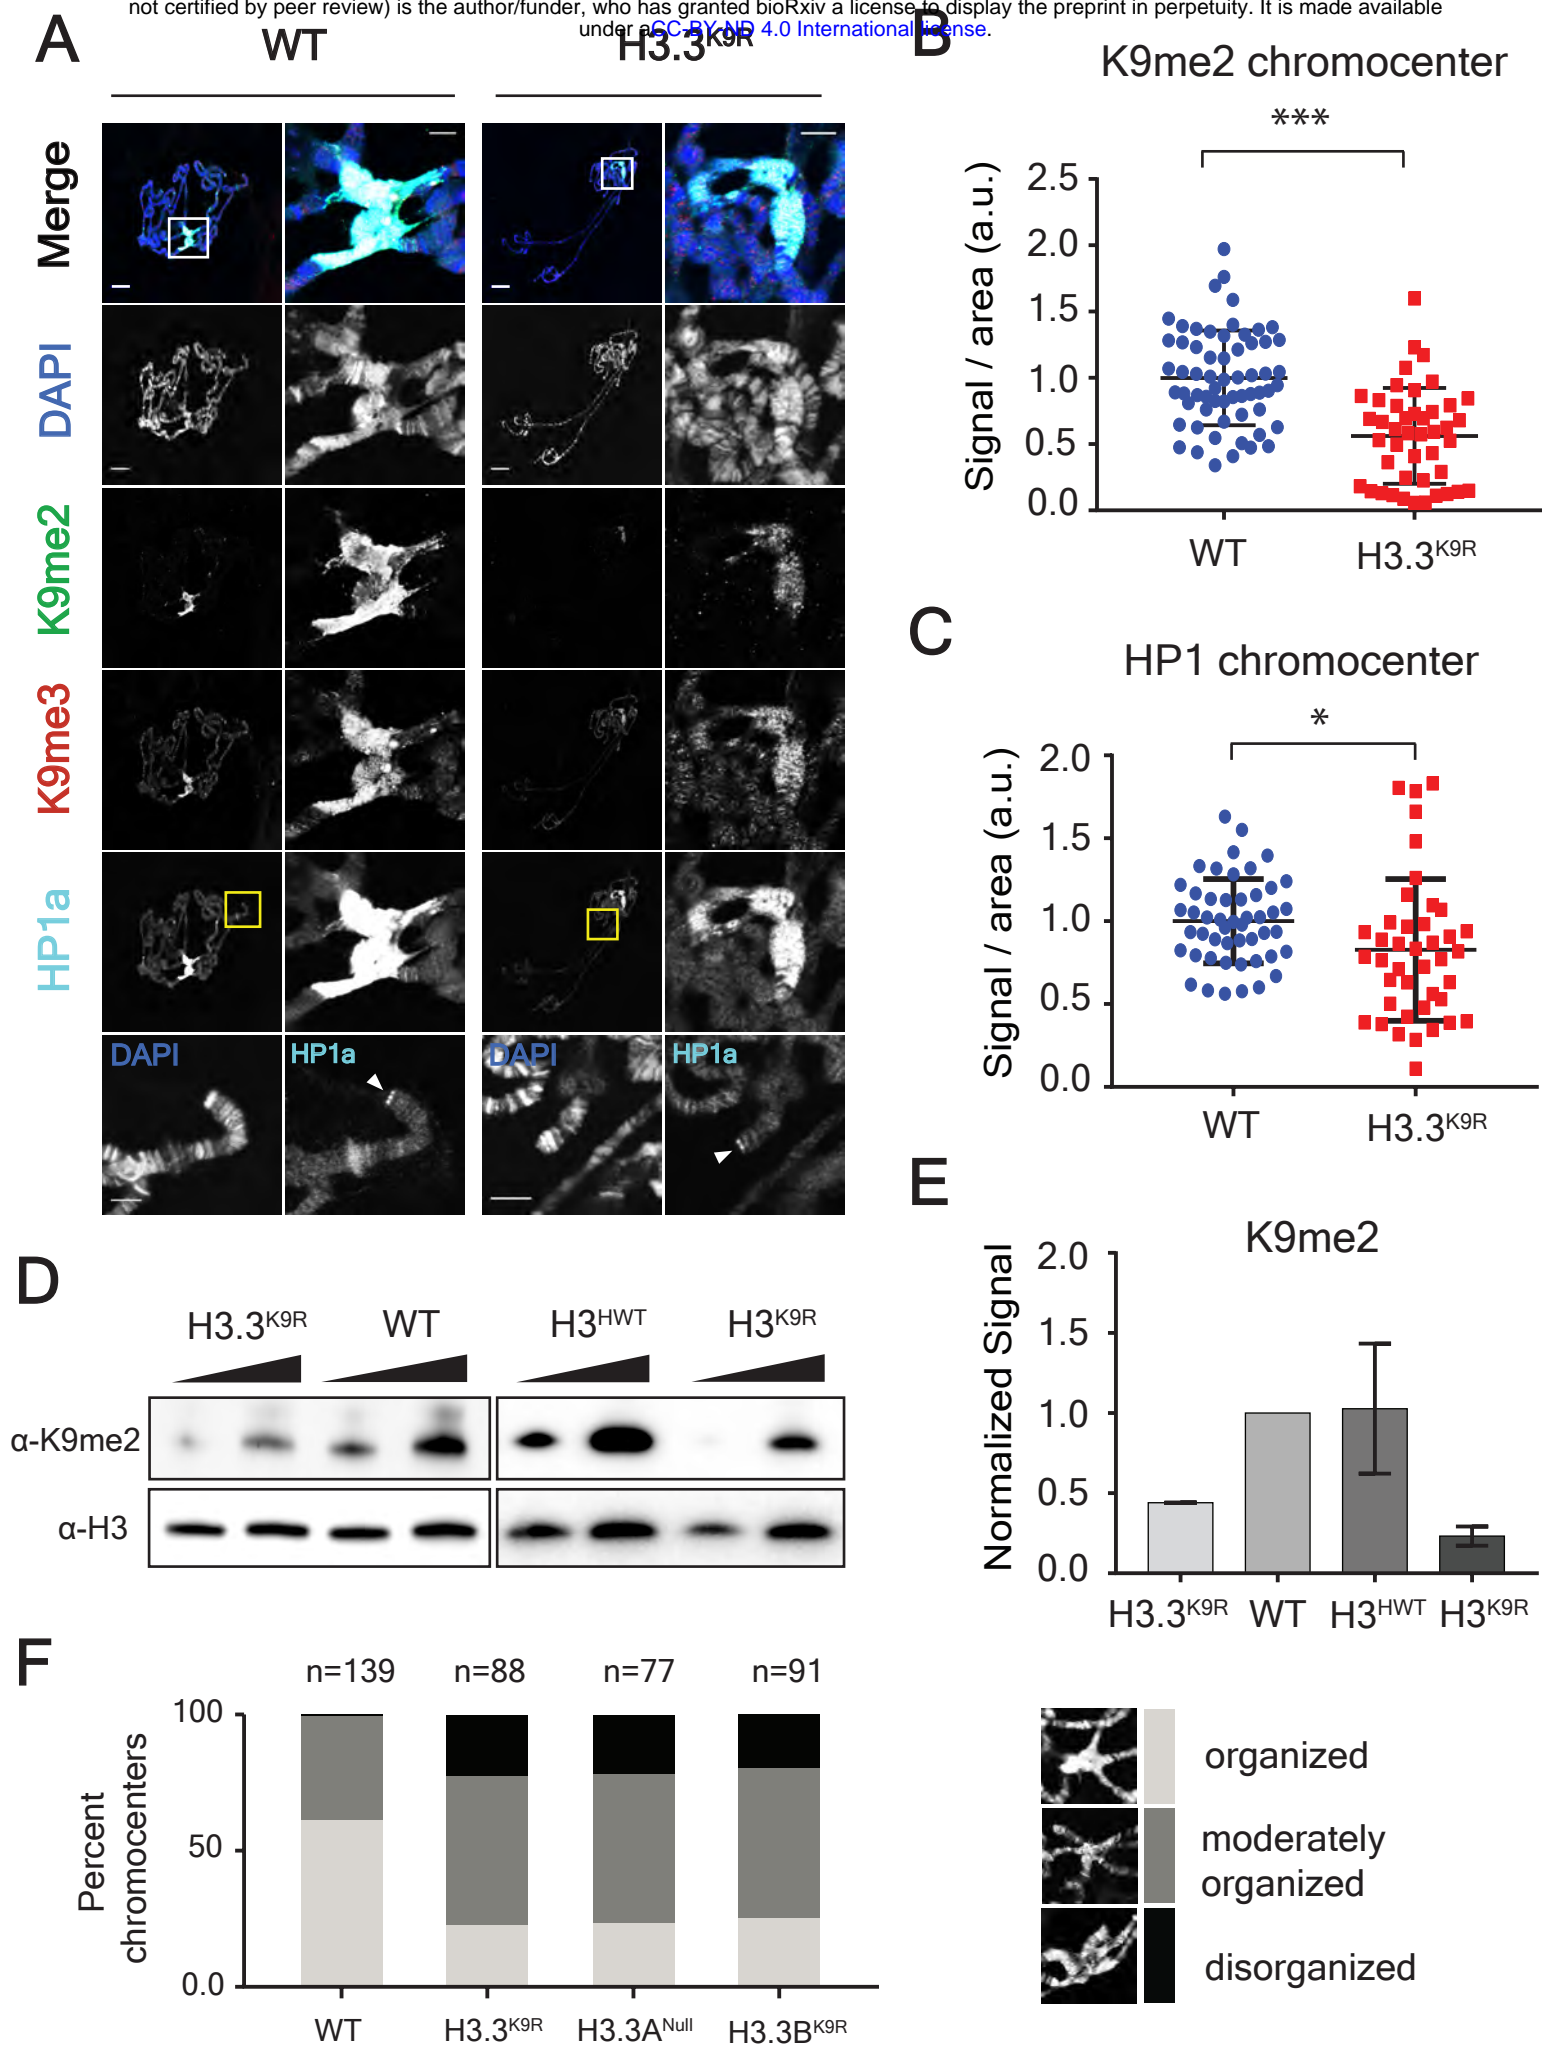

A

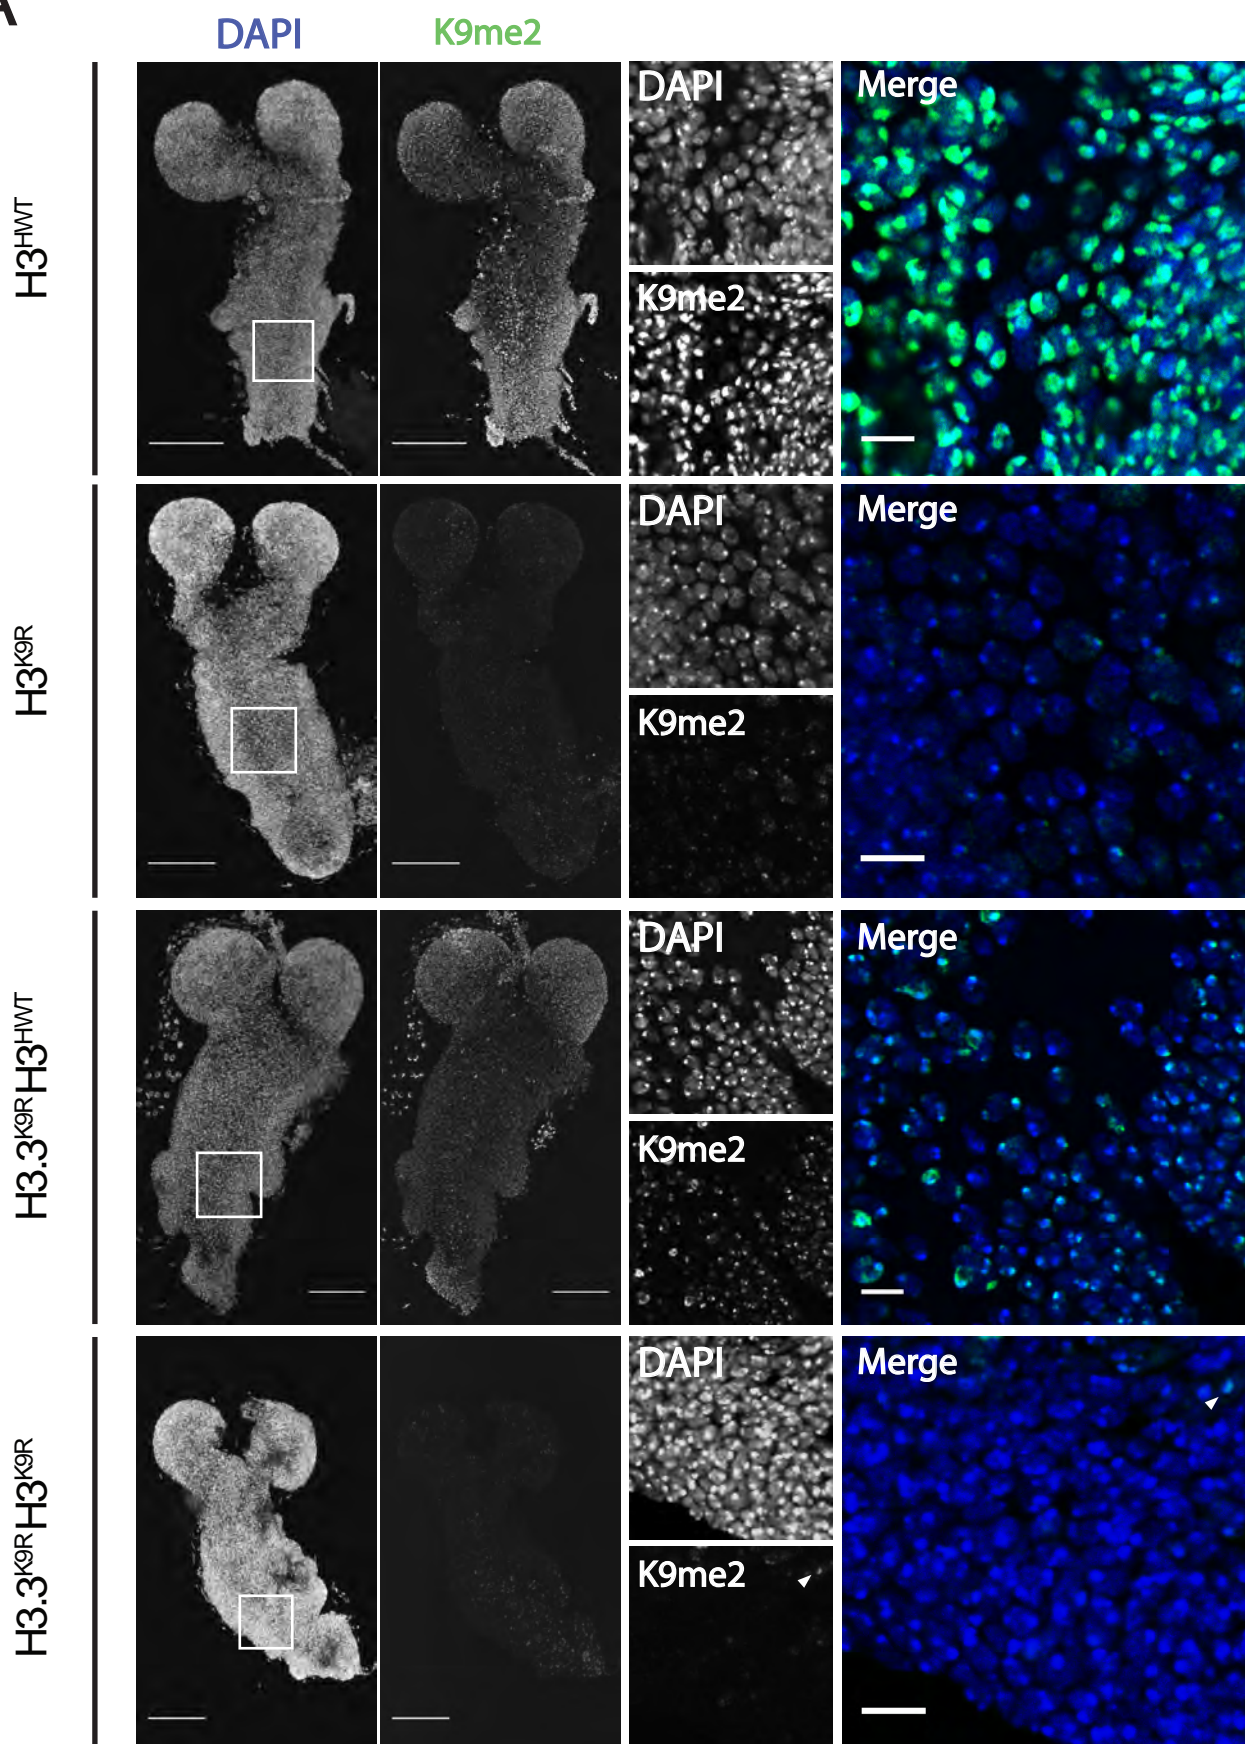



**A**

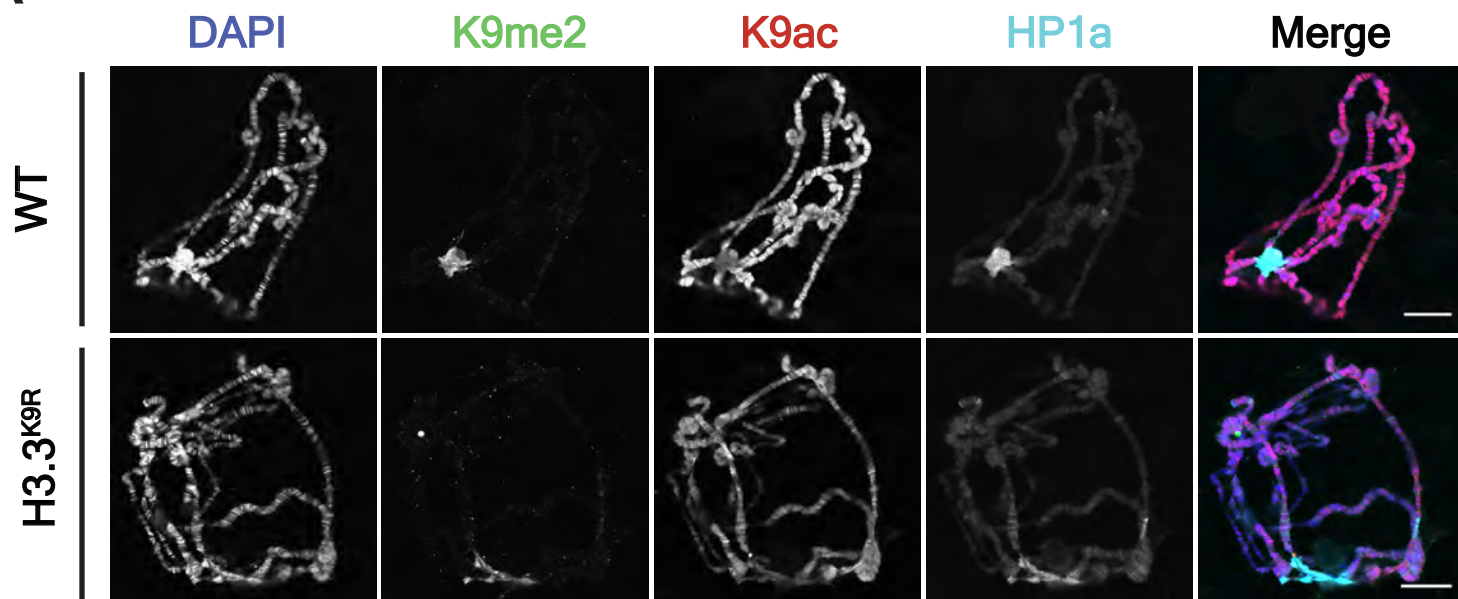

**B**

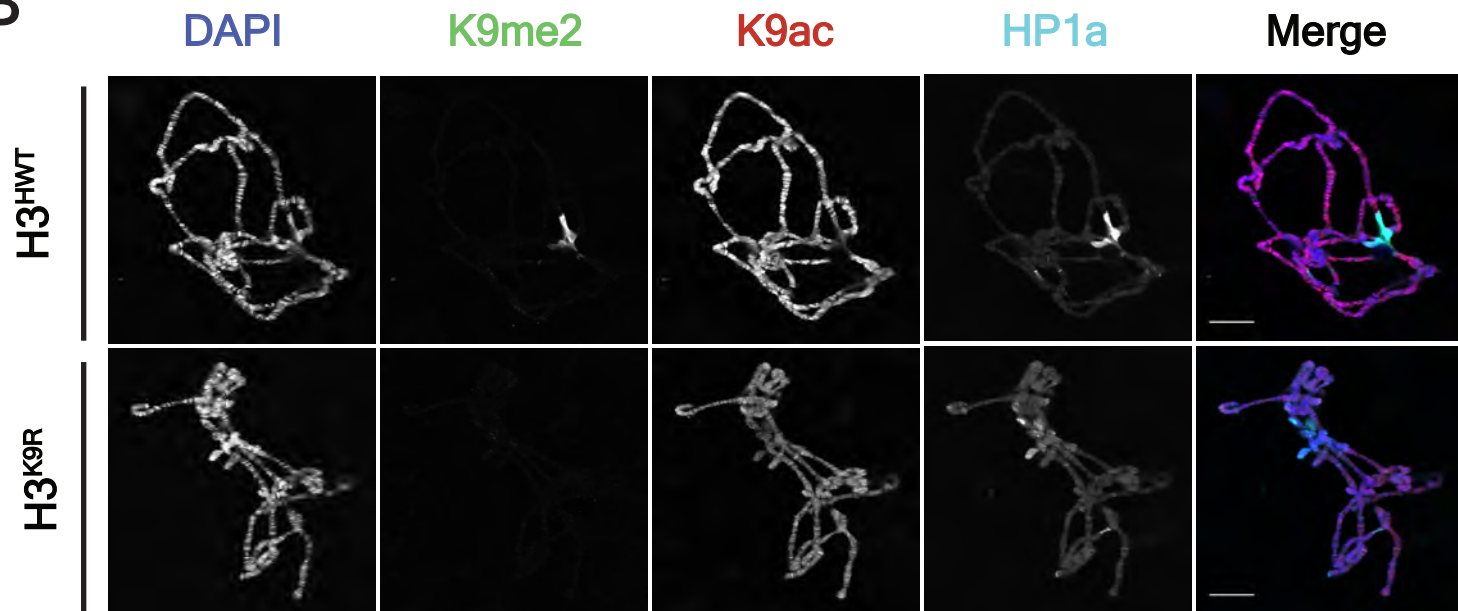

**C**

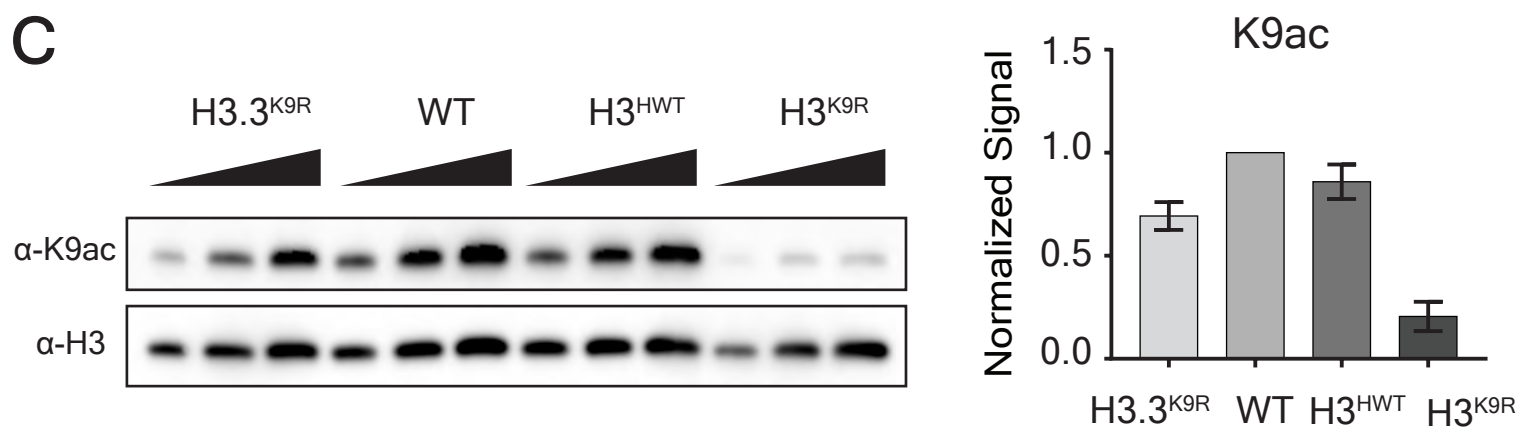

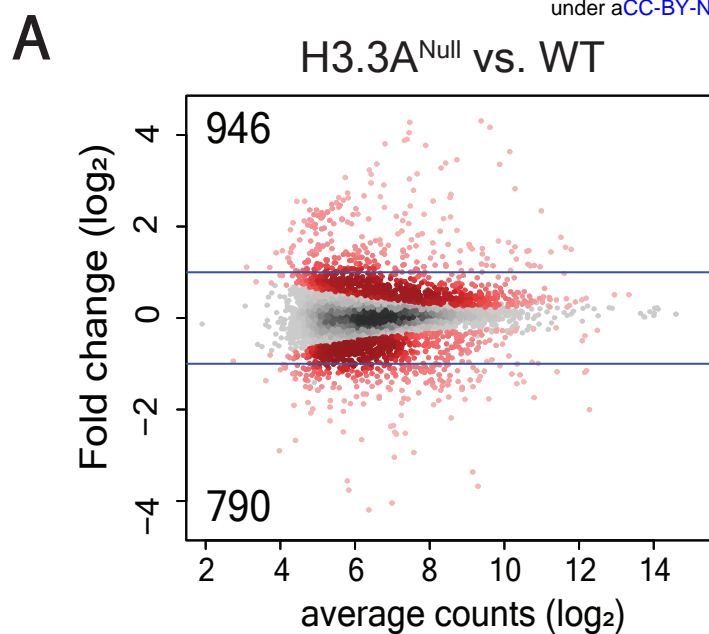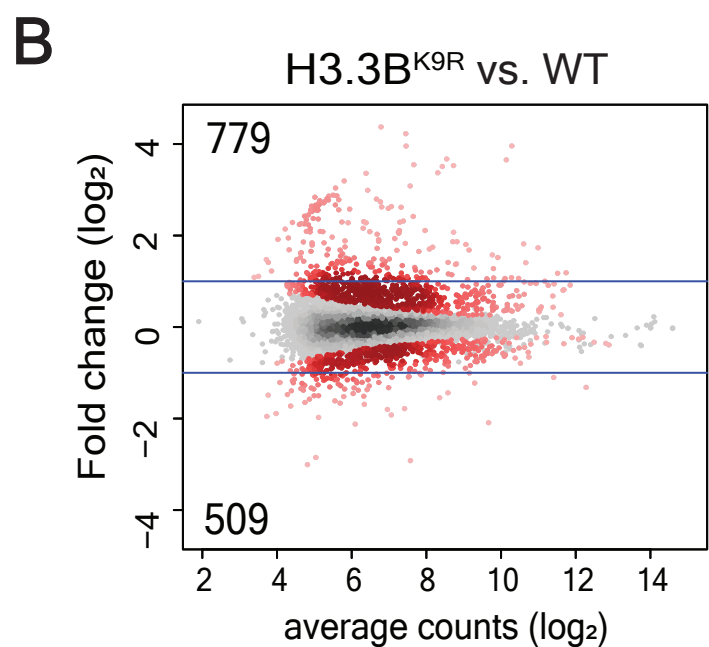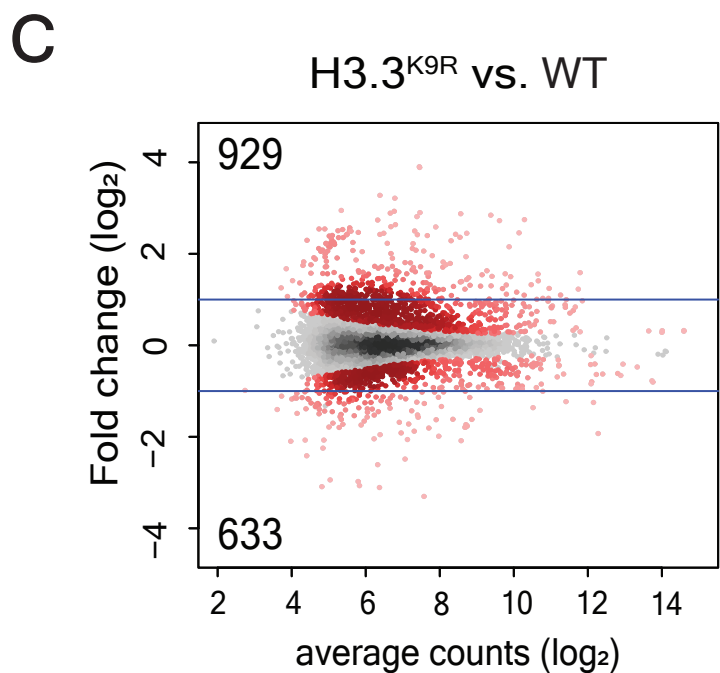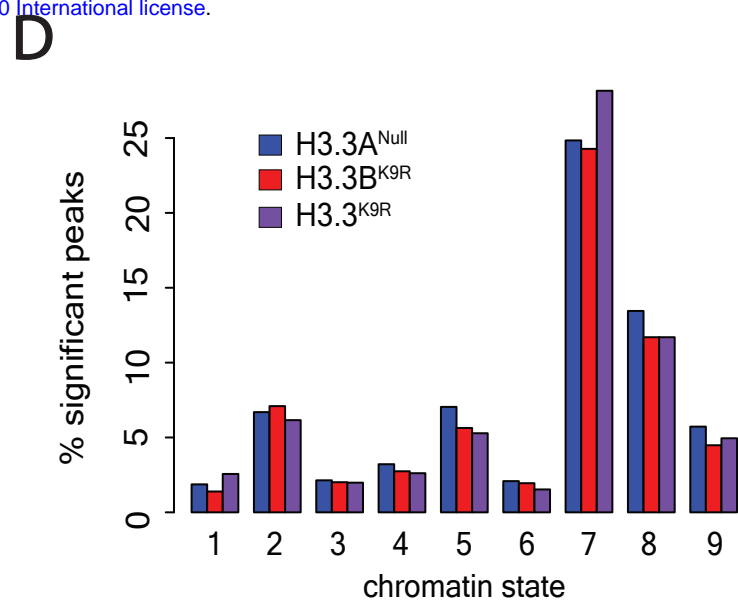

**E**

| state | definition        | peaks |
|-------|-------------------|-------|
| 1     | H3K4me2/3, H3K9ac | 5433  |
| 2     | H3K36me3          | 691   |
| 3     | H3K18ac, H3K27ac  | 3134  |
| 4     | H3K36me           | 2260  |
| 5     | H4K16ac, H3K36me3 | 534   |
| 6     | H3K27me2/3        | 1400  |
| 7     | H3K9me2/3         | 823   |
| 8     | Low H3K9me2/3     | 133   |
| 9     | H1, SUUR          | 3557  |

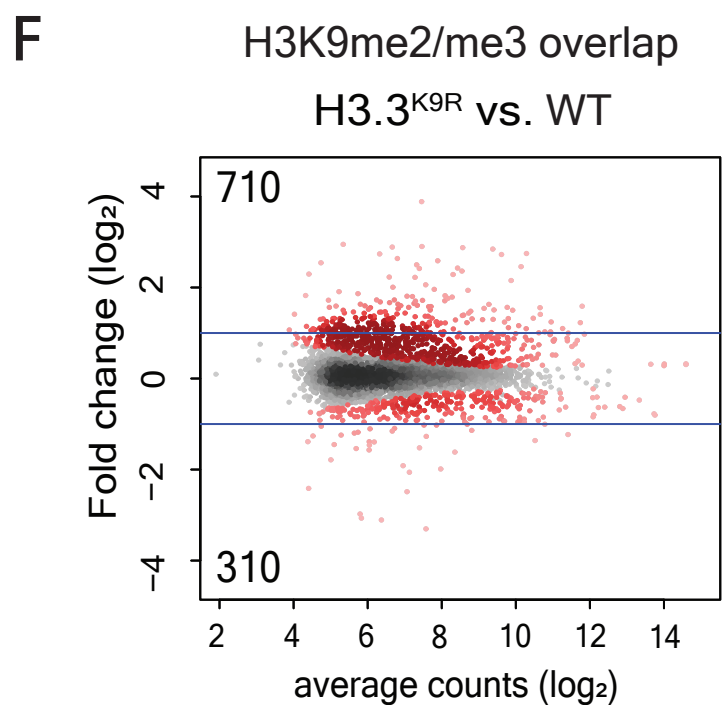

**A**

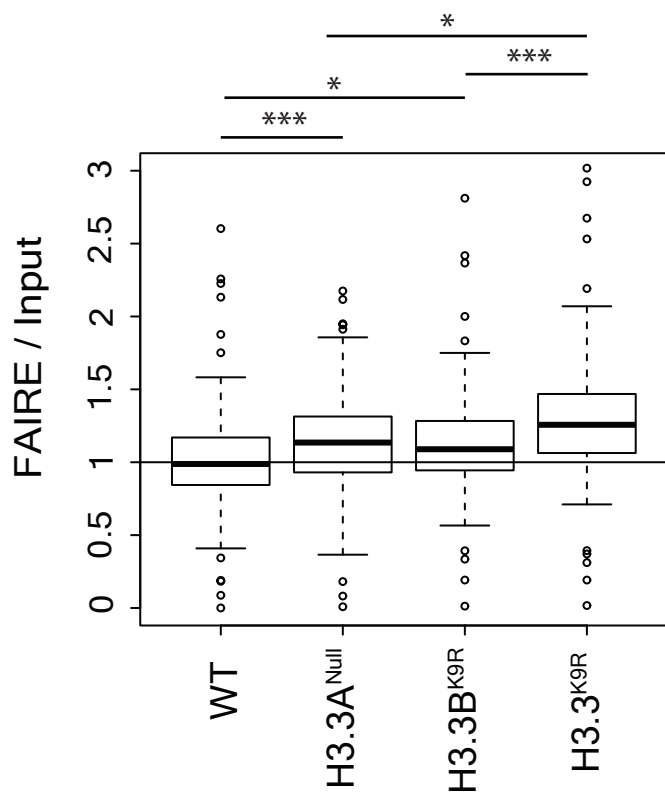

**B**

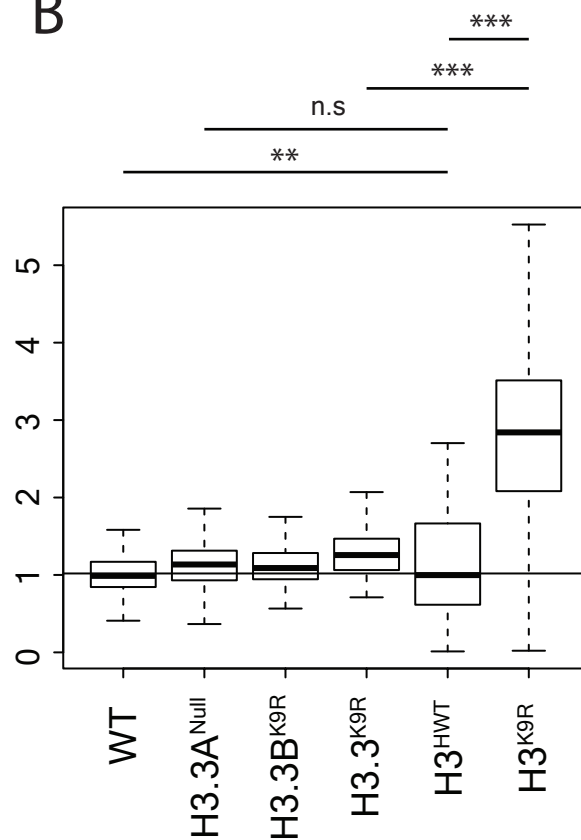

**C**

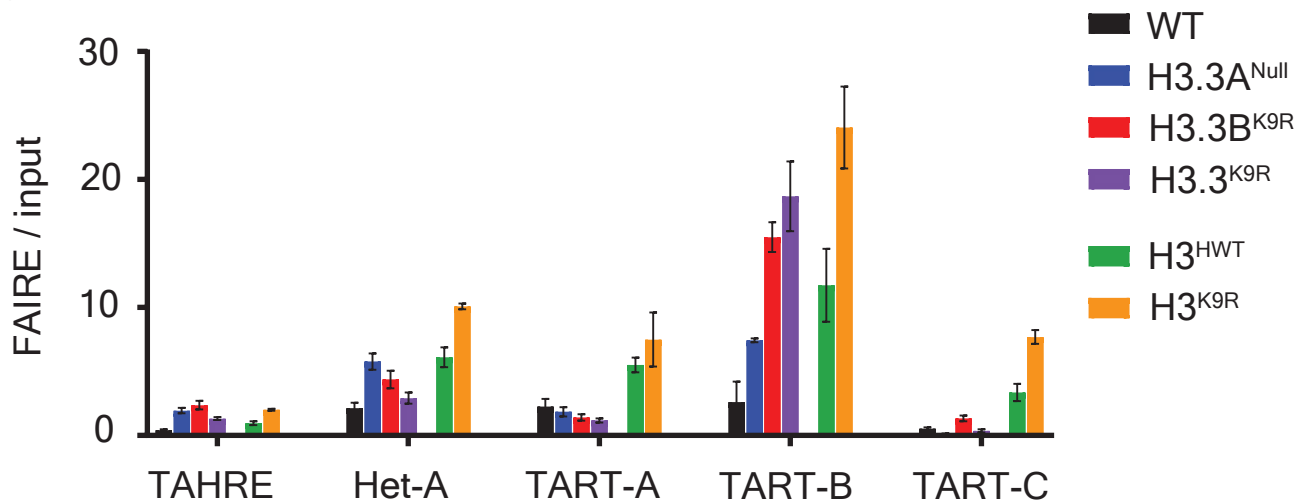



**A**

H3<sup>K9R</sup> vs. H3<sup>HWT</sup>

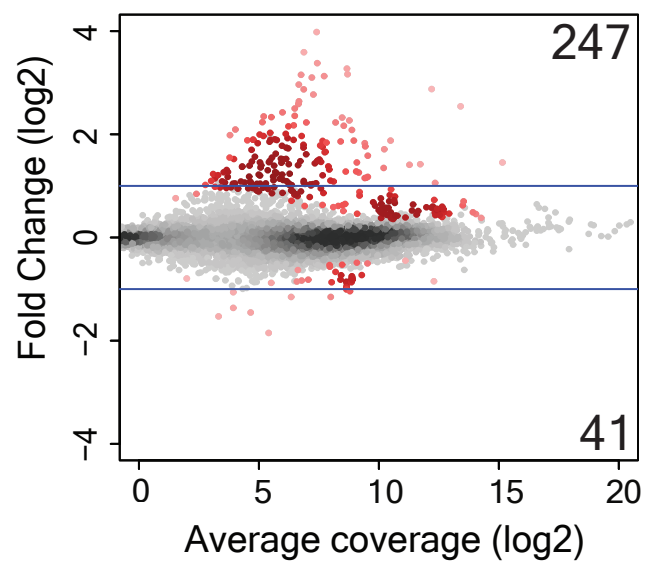

**B**

H3.3<sup>K9R</sup> H3<sup>HWT</sup> vs. H3<sup>HWT</sup>

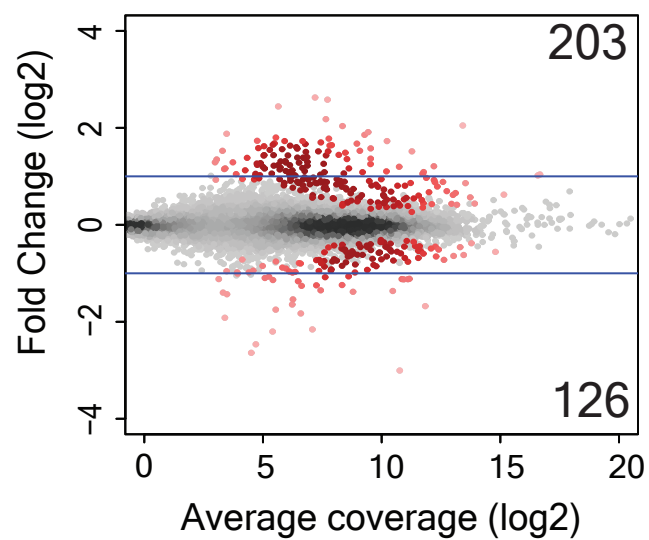

**C**

H3.3<sup>K9R</sup> H3<sup>K9R</sup> vs. H3<sup>HWT</sup>

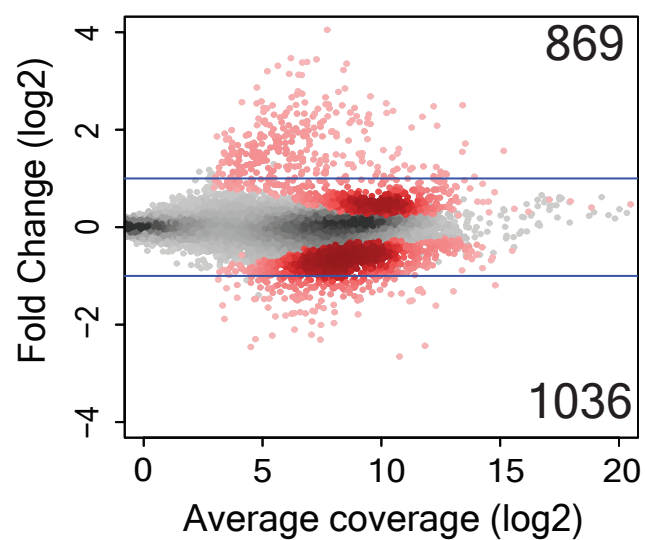

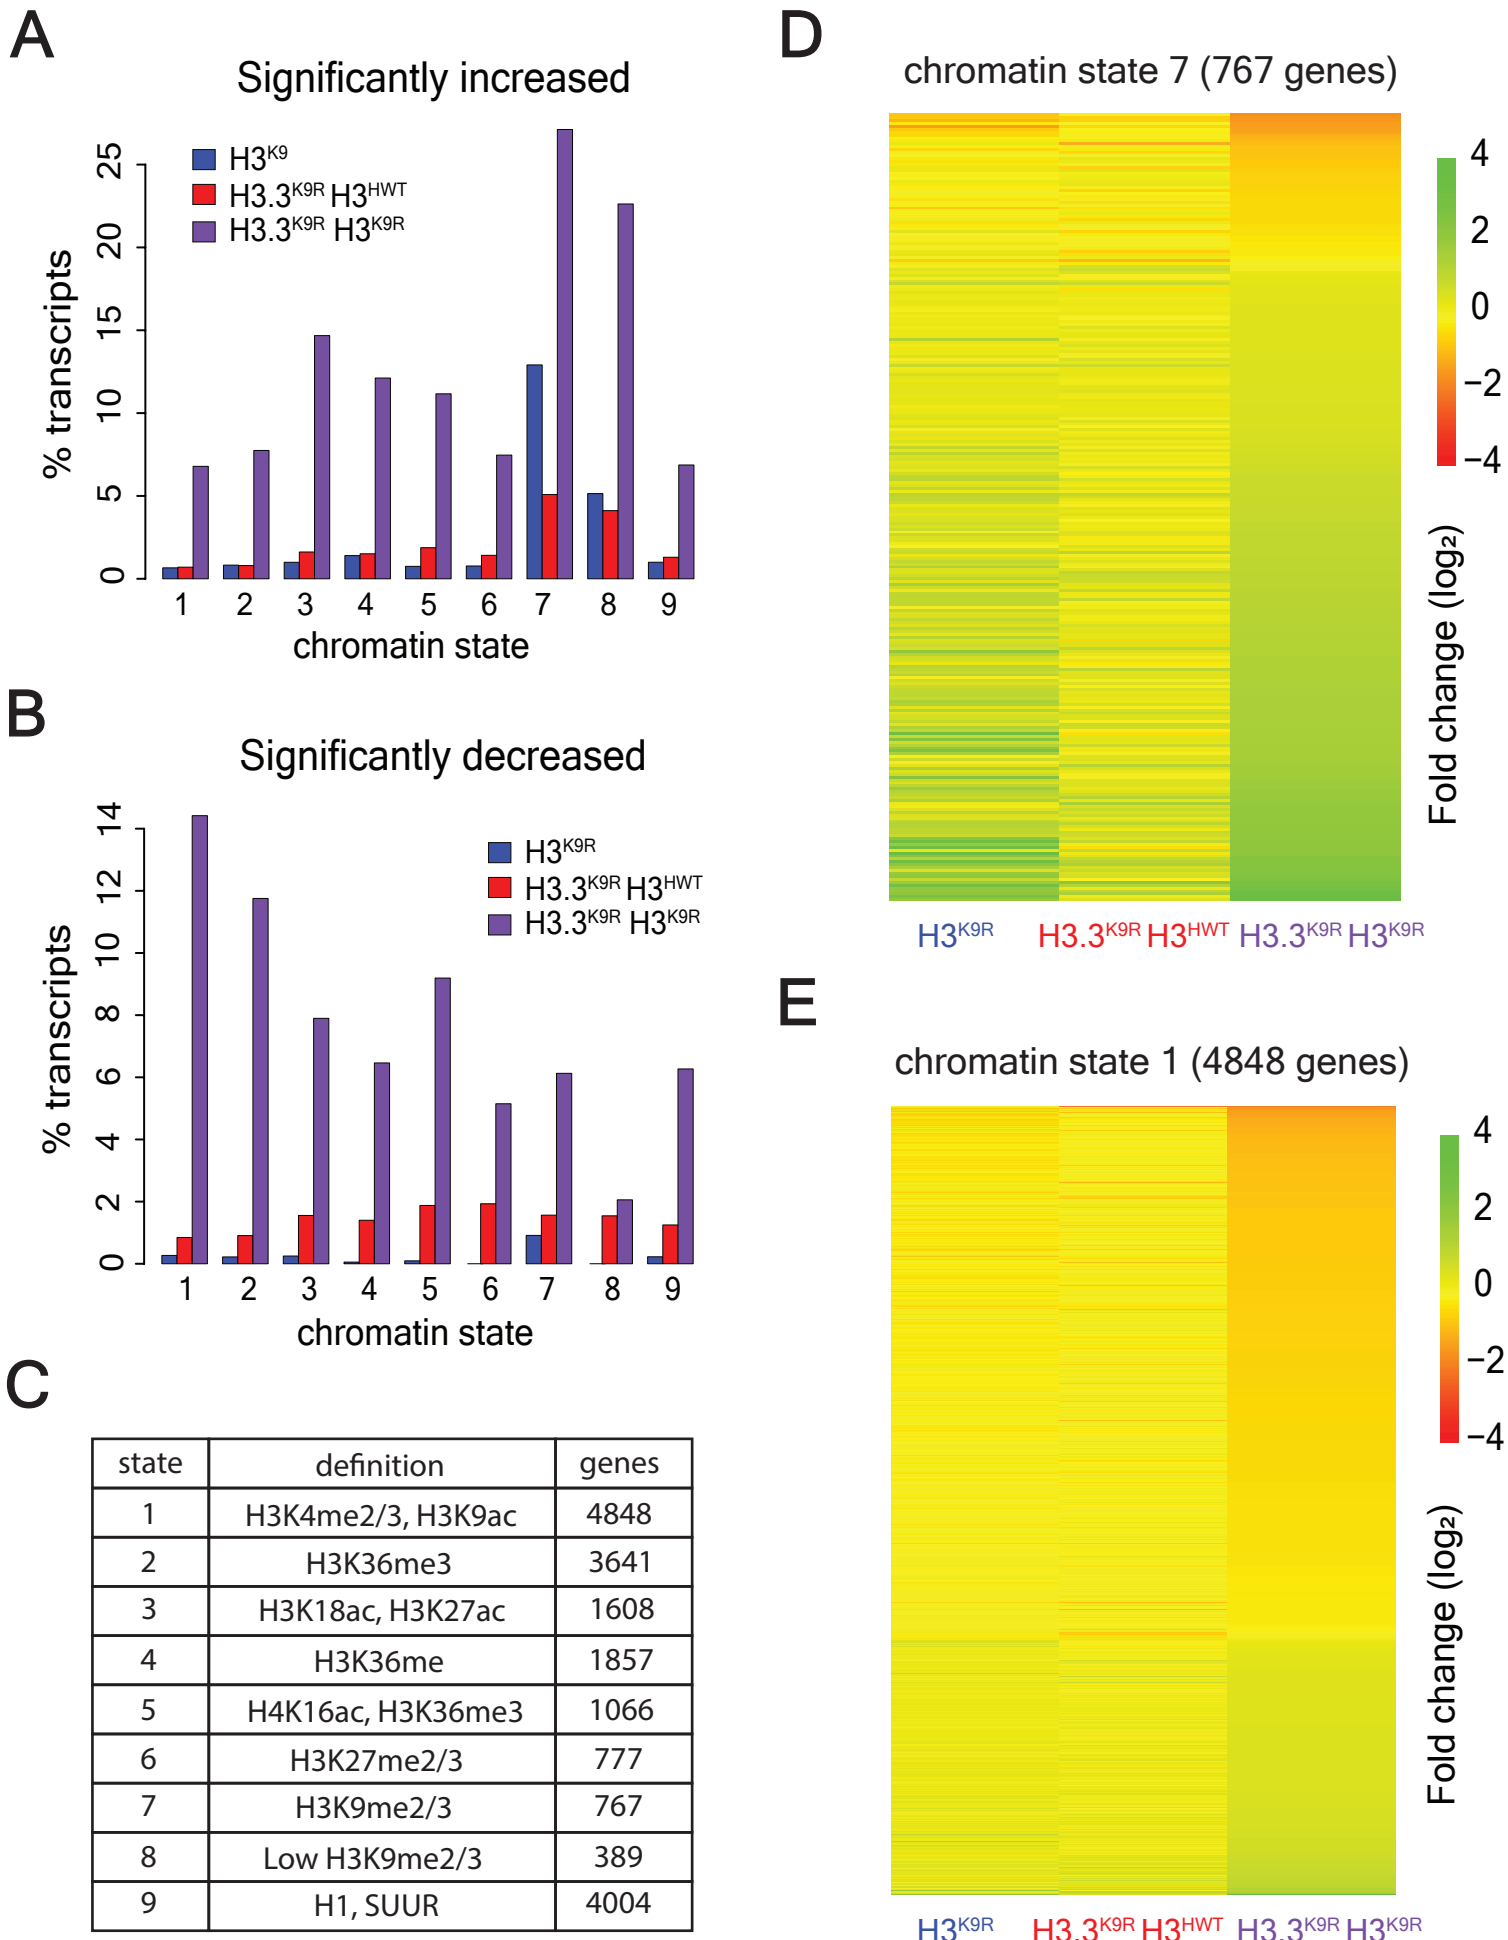

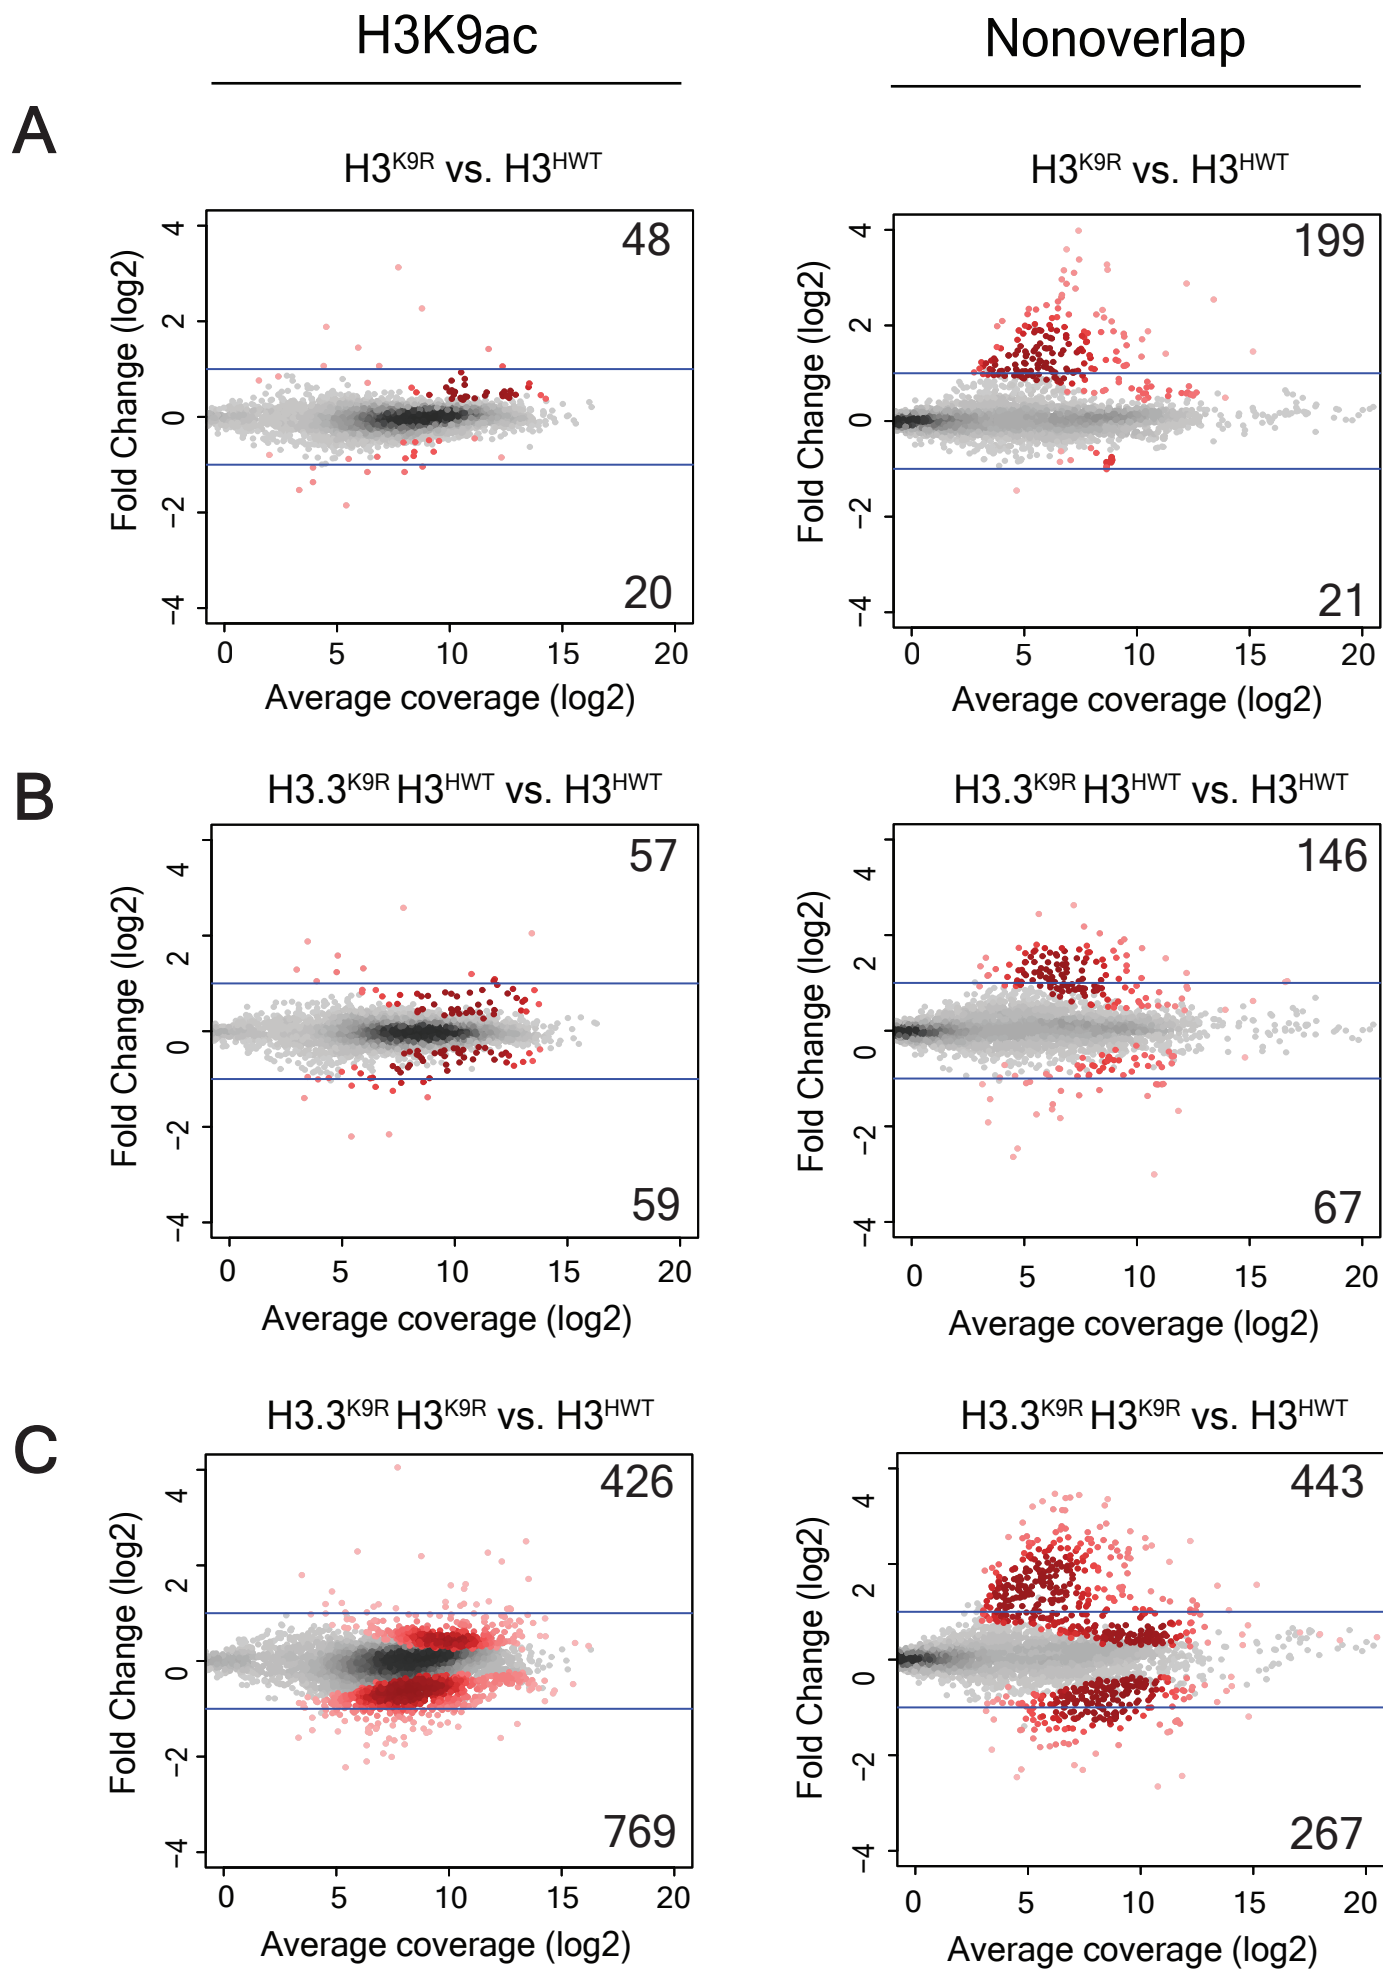

Source: https://www.biorxiv.org/content/10.1101/183251v2.full.pdf
